# Supplementary material for: Two-pot sequential multicomponent metal-free synthesis of pyrrolo[2,3-d]pyridazin-7-ones and pyrrolo[2,3-d]pyrizidines
Source: Royal Society of Chemistry journal article supplement (doi:10.1039/d3nj02249h), 2023-01-01
Supplement: d3nj02249h1.pdf [file d3nj02249h1.pdf]

## Supporting Information

### Two-pot sequential multicomponent metal-free synthesis of pyrrolo[2,3-*d*]pyridazin-7-ones and pyrrolo[2,3-*d*]pyrizidines

Mamta,<sup>a</sup> Nisar A. Mir,<sup>a</sup> Jyothi Yadav,<sup>a</sup> Amol P. Pawar,<sup>a</sup> Ratika Sharma,<sup>b</sup> Rajni Kant,<sup>b</sup> Krishnan

Rangan,<sup>c</sup> Eldhose Iype,<sup>d</sup> and Bharti Khungar,<sup>a</sup> Indresh Kumar\*<sup>a</sup>

<sup>a</sup>*Department of Chemistry, Birla Institute of Technology & Science, Pilani, Rajasthan, India*

*E-mail: [indresh.kumar@pilani.bits-pilani.ac.in](mailto:indresh.kumar@pilani.bits-pilani.ac.in), [indresh.chemistry@gmail.com](mailto:indresh.chemistry@gmail.com)*

<sup>b</sup>*X-ray Crystallography Laboratory, Post-Graduate Department of Physics & Electronics,  
University of Jammu, Jammu and Kashmir, India*

<sup>c</sup>*Department of Chemistry, BITS Pilani, Hyderabad Campus, Secunderabad, India*

<sup>d</sup>*College of Engineering and Technology, American University of the Middle East, Kuwait*

Table of Contents:

---

|                                                                                 |         |
|---------------------------------------------------------------------------------|---------|
| Copies of <sup>1</sup> H and <sup>13</sup> C-NMR Spectra for all compounds..... | S2- S30 |
| Single Crystal X-ray study and data for <b>7aj</b> and <b>10ba</b> .....        | S31-S37 |

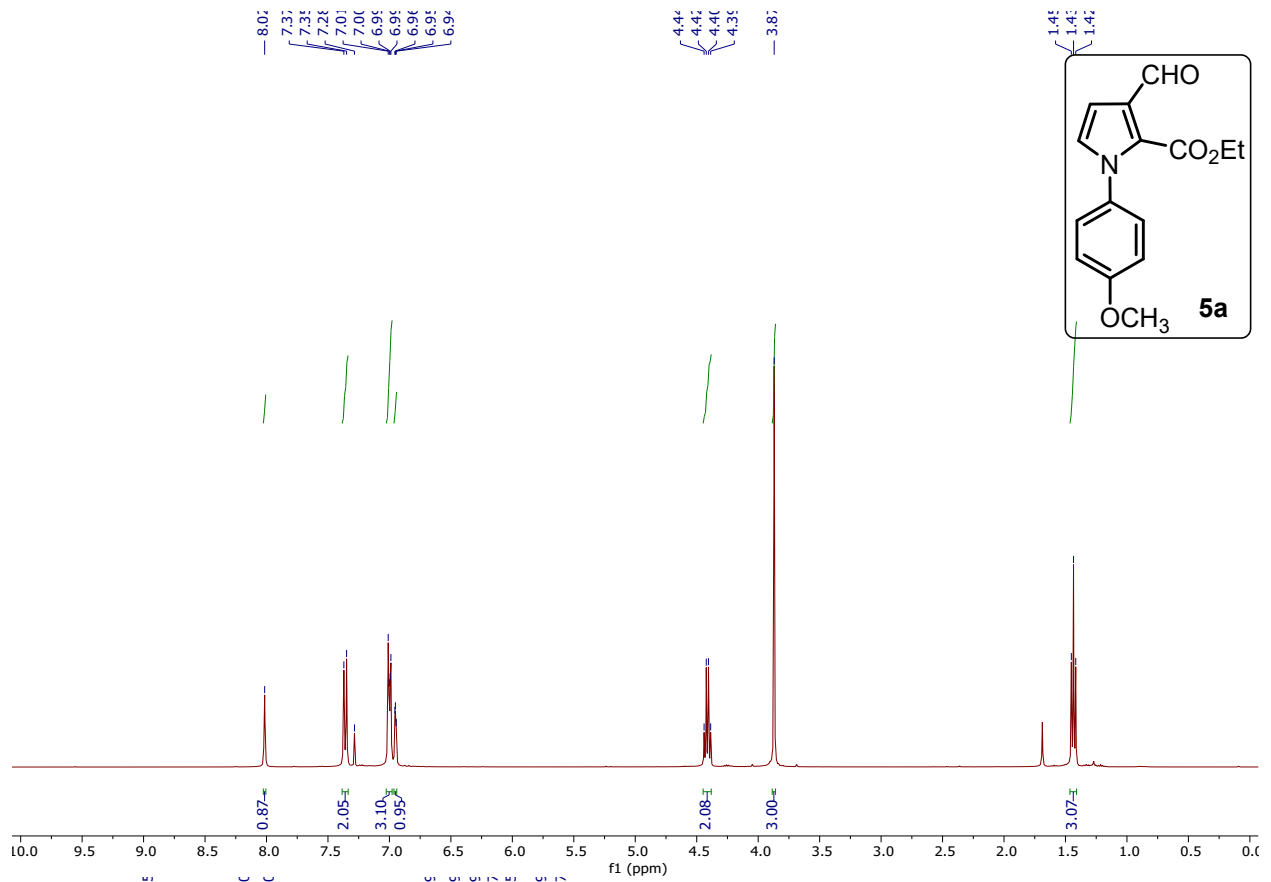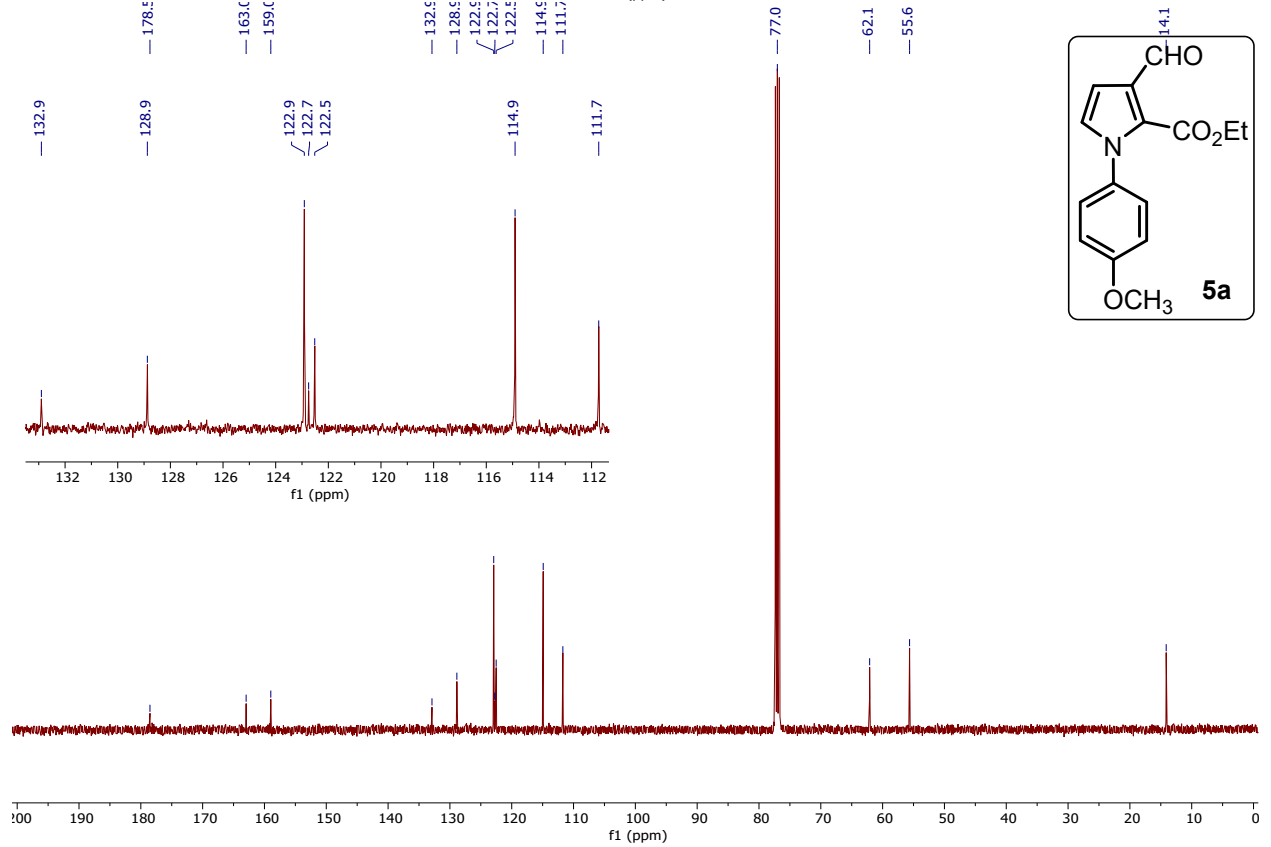

NPHH-02  
NPHH-02

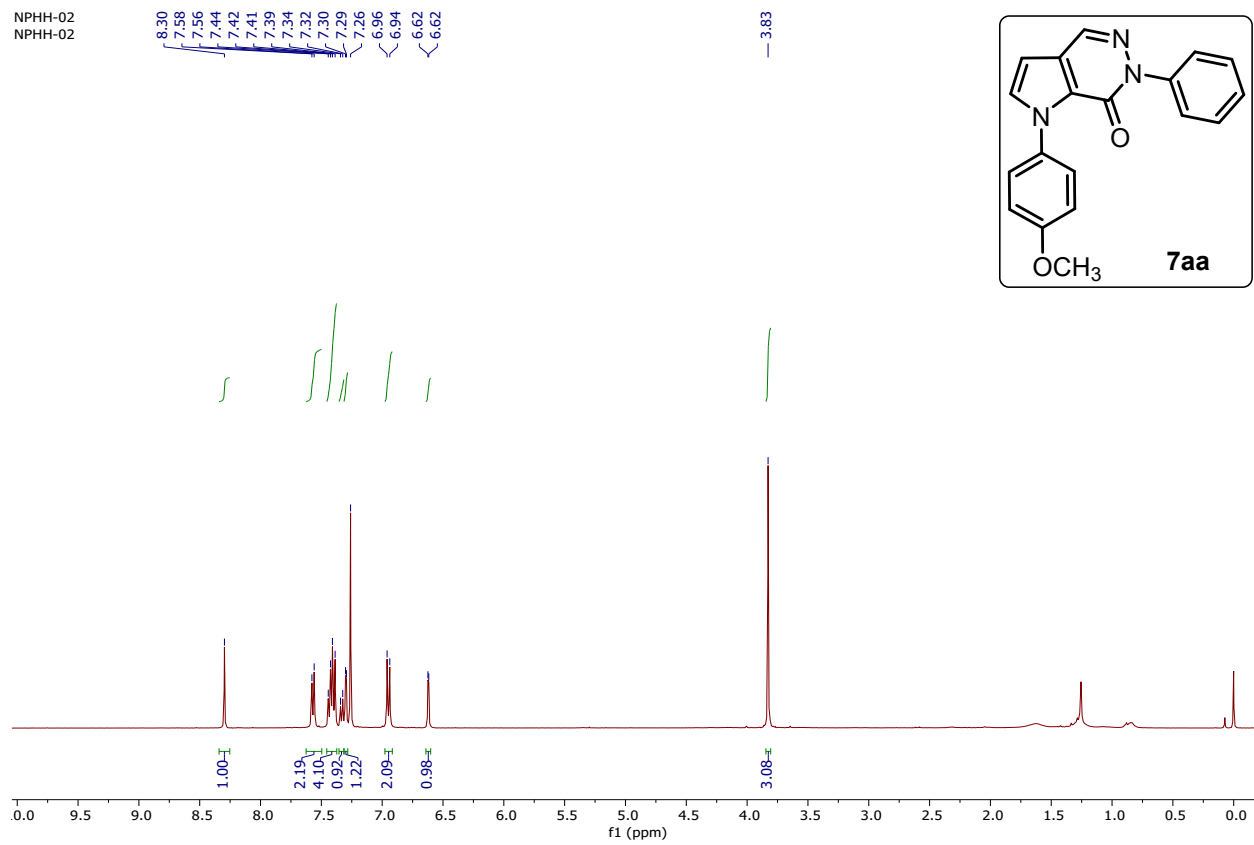

NPHH-02

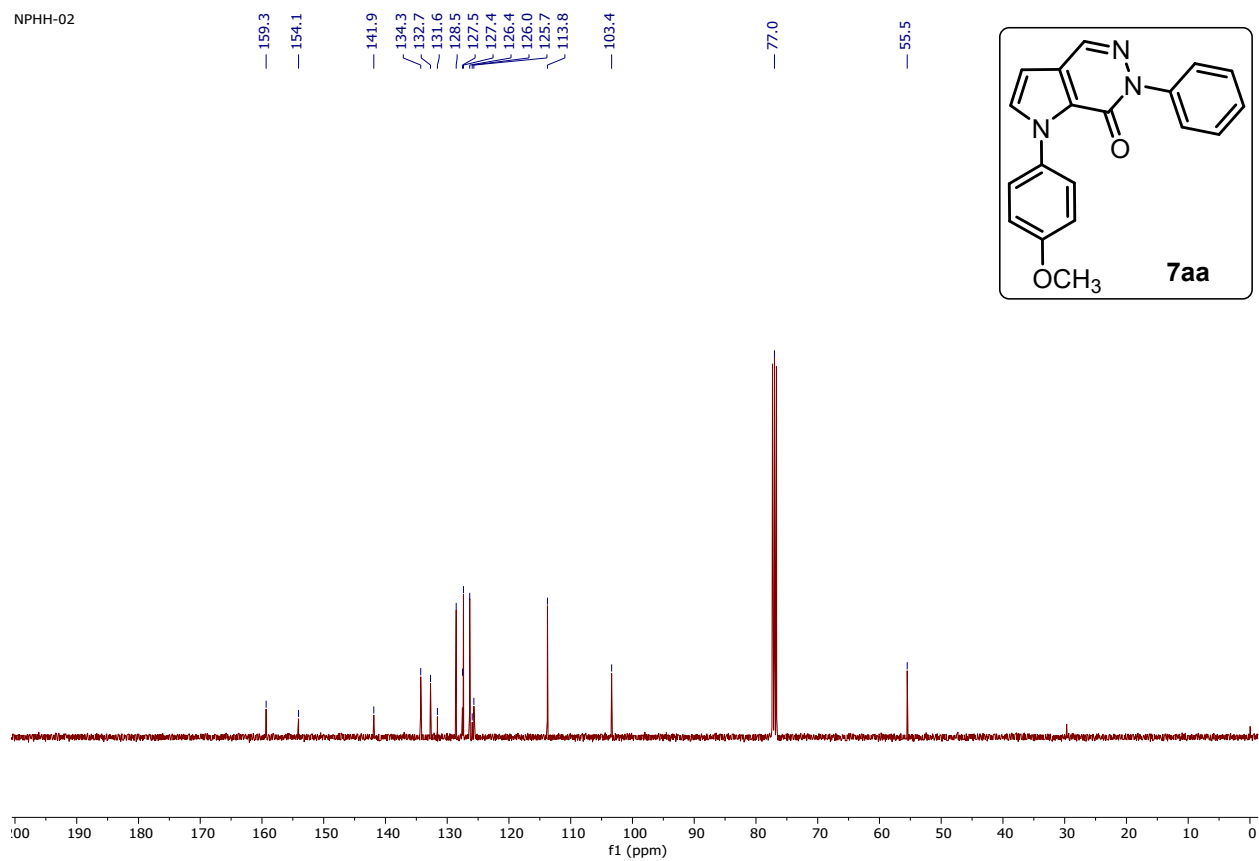

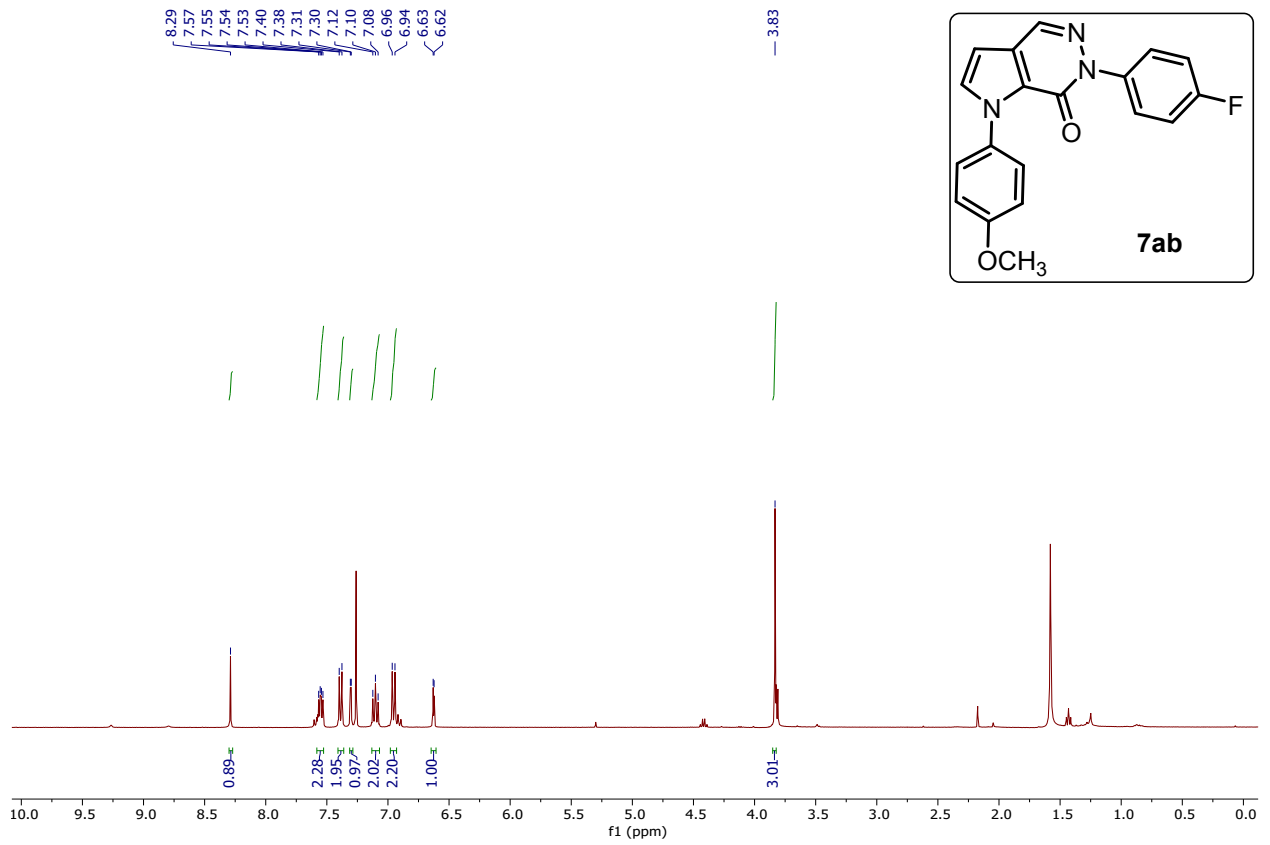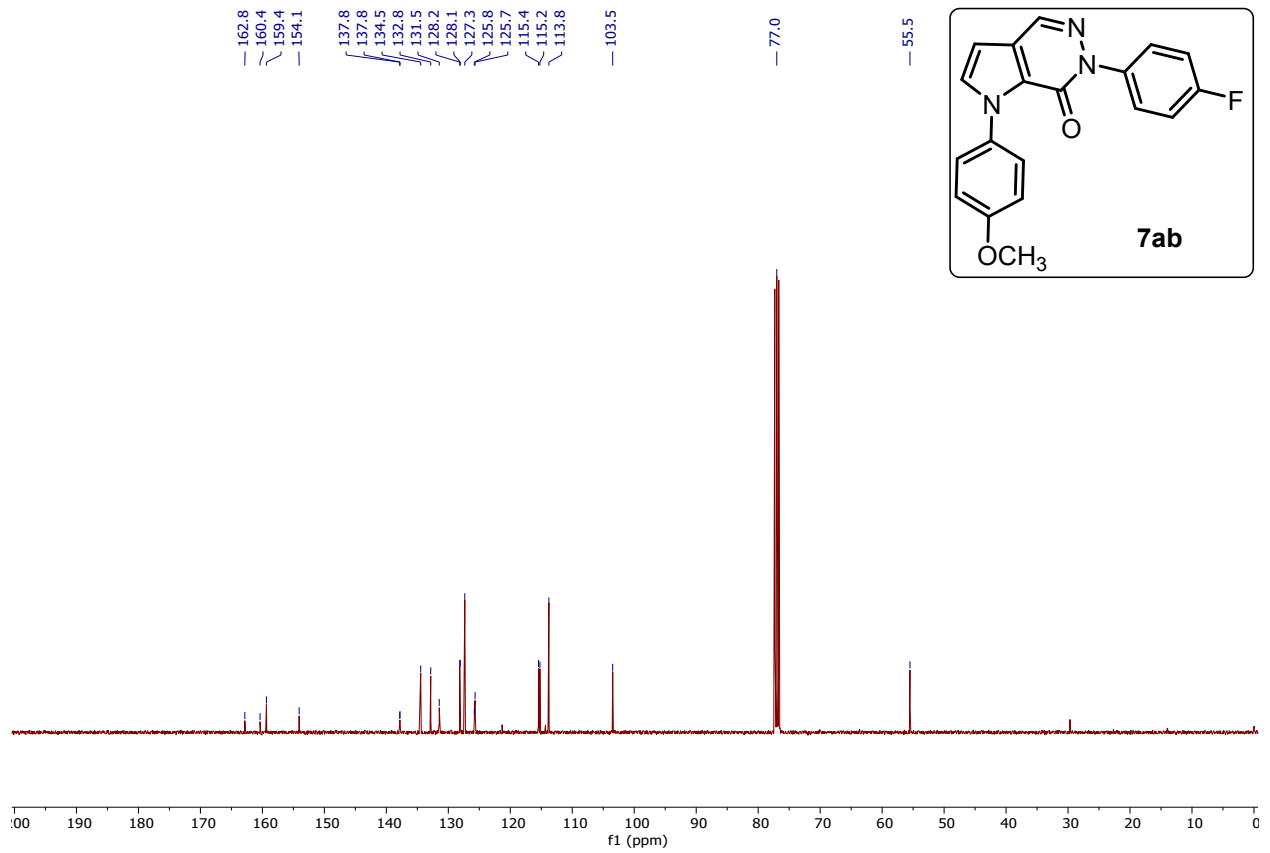

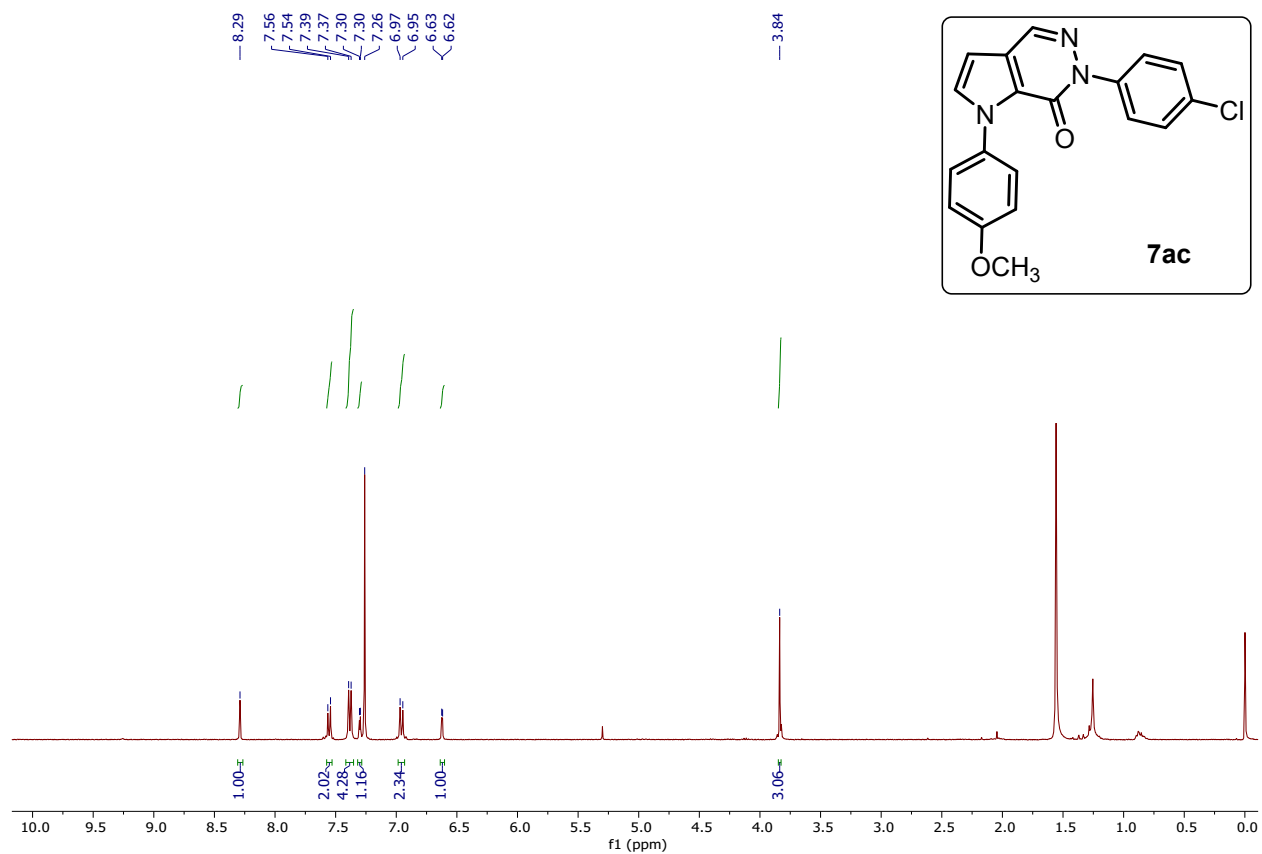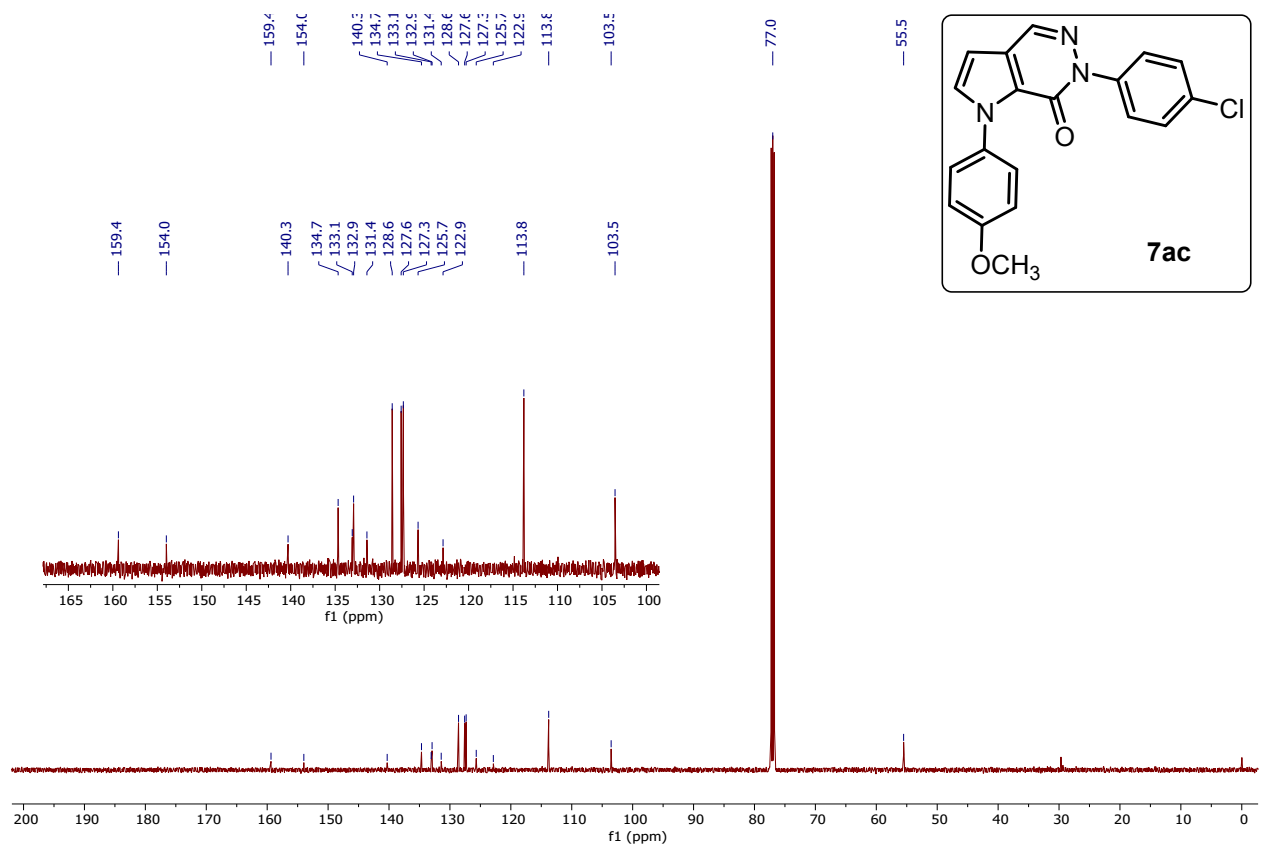

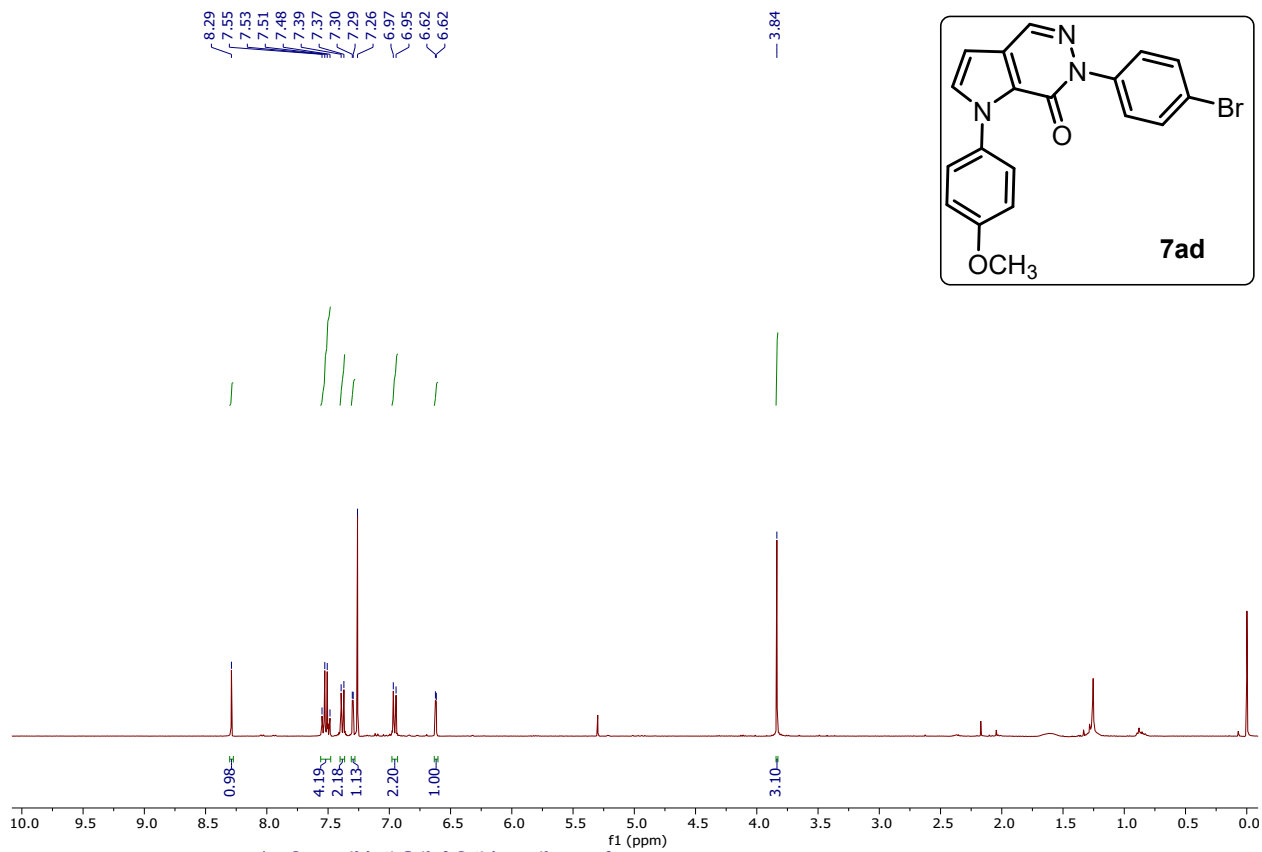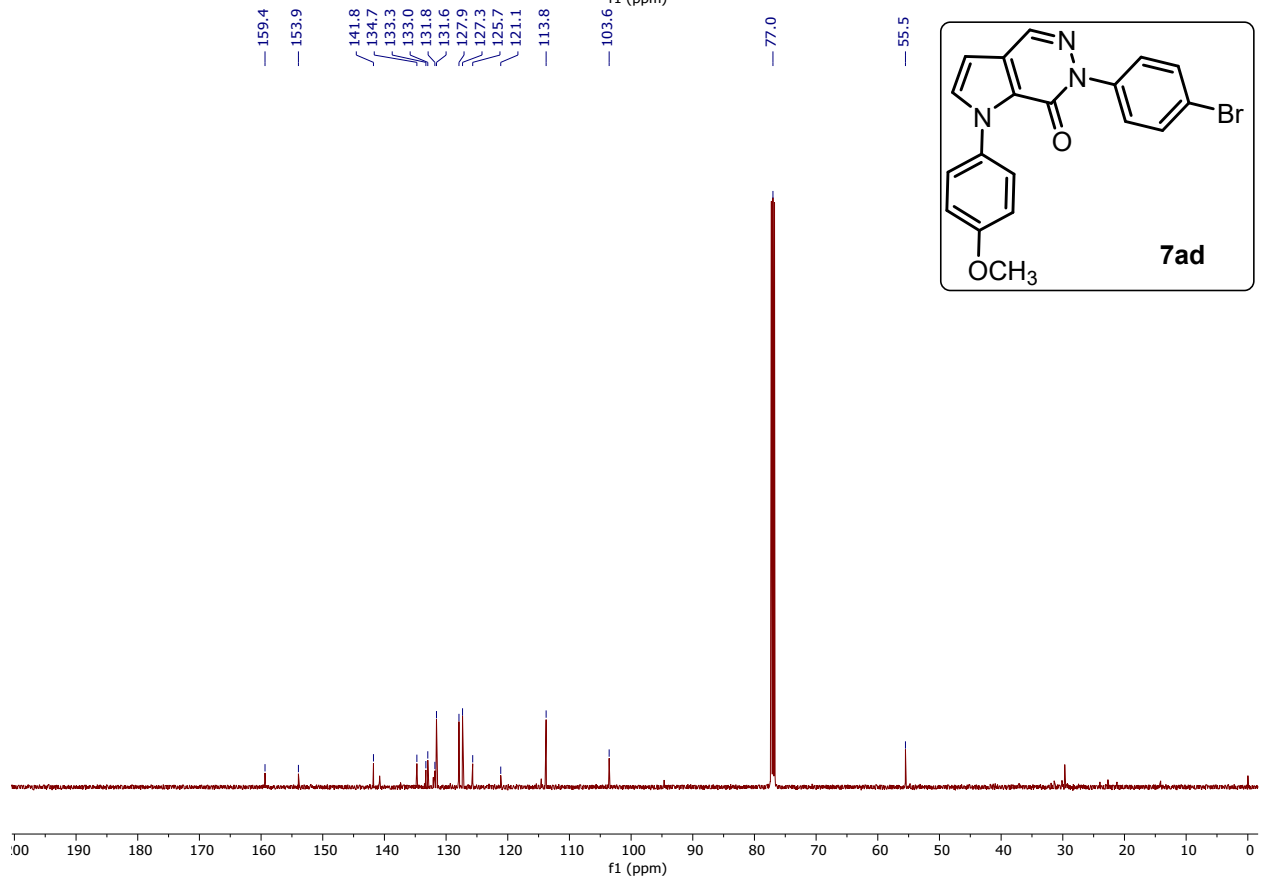

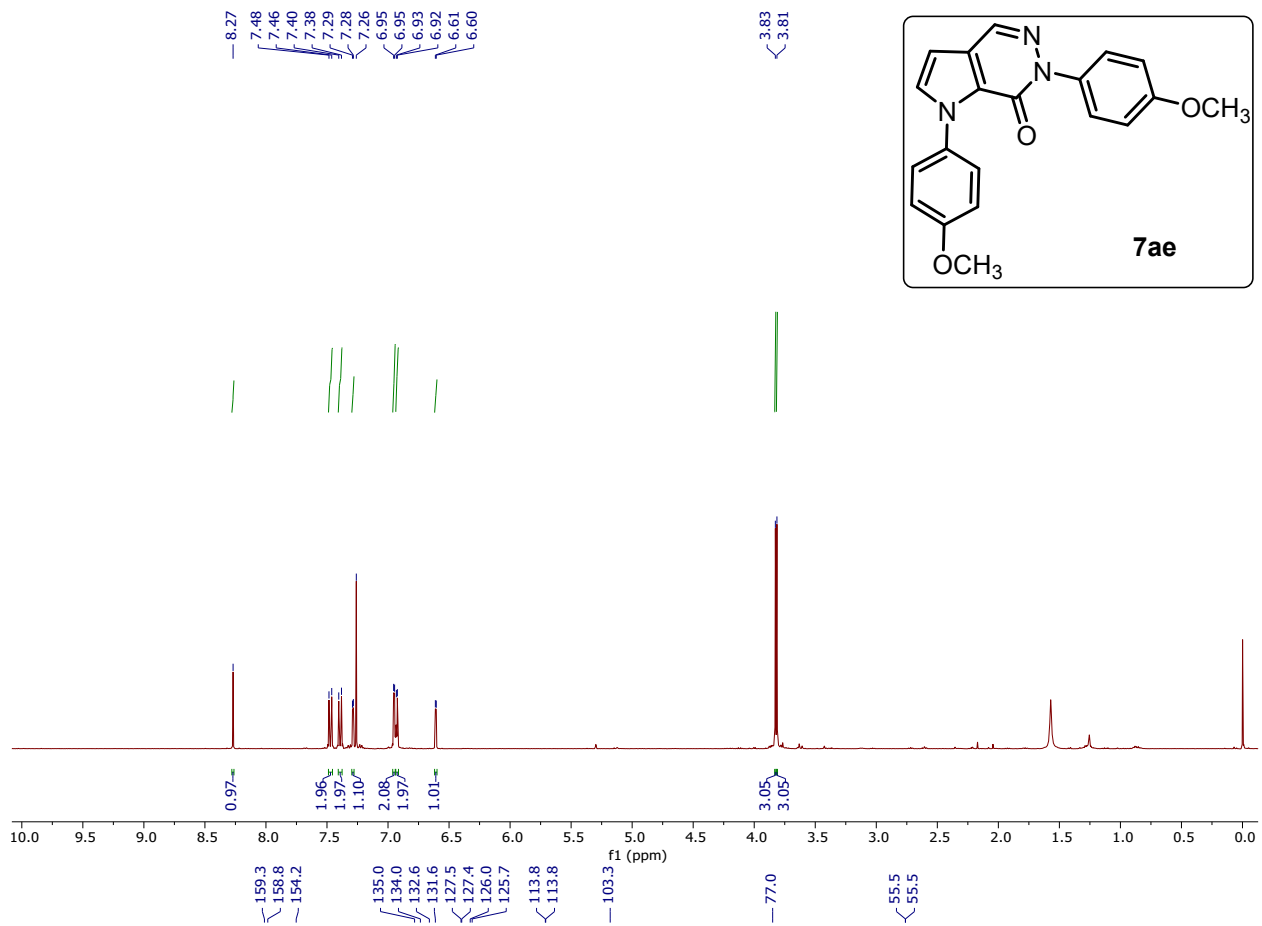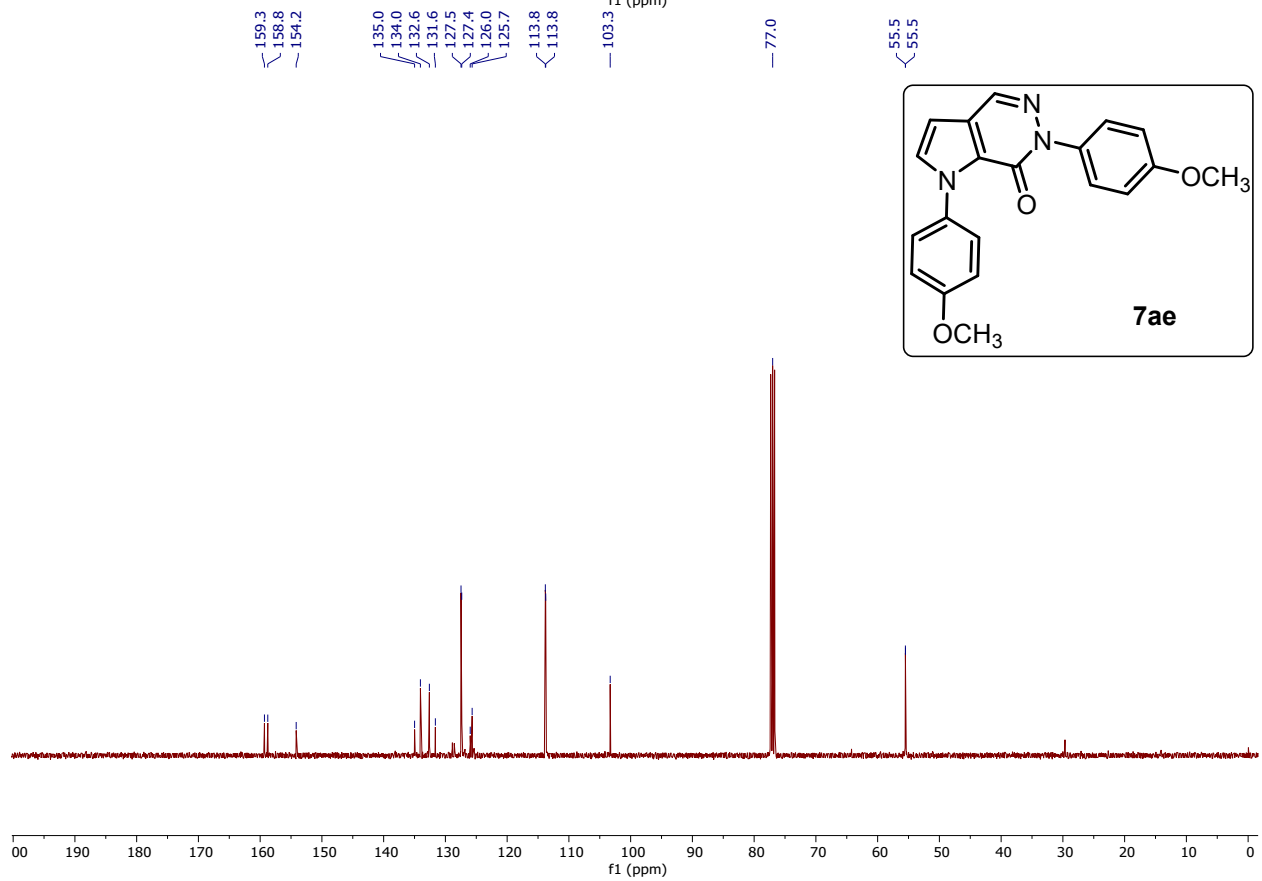

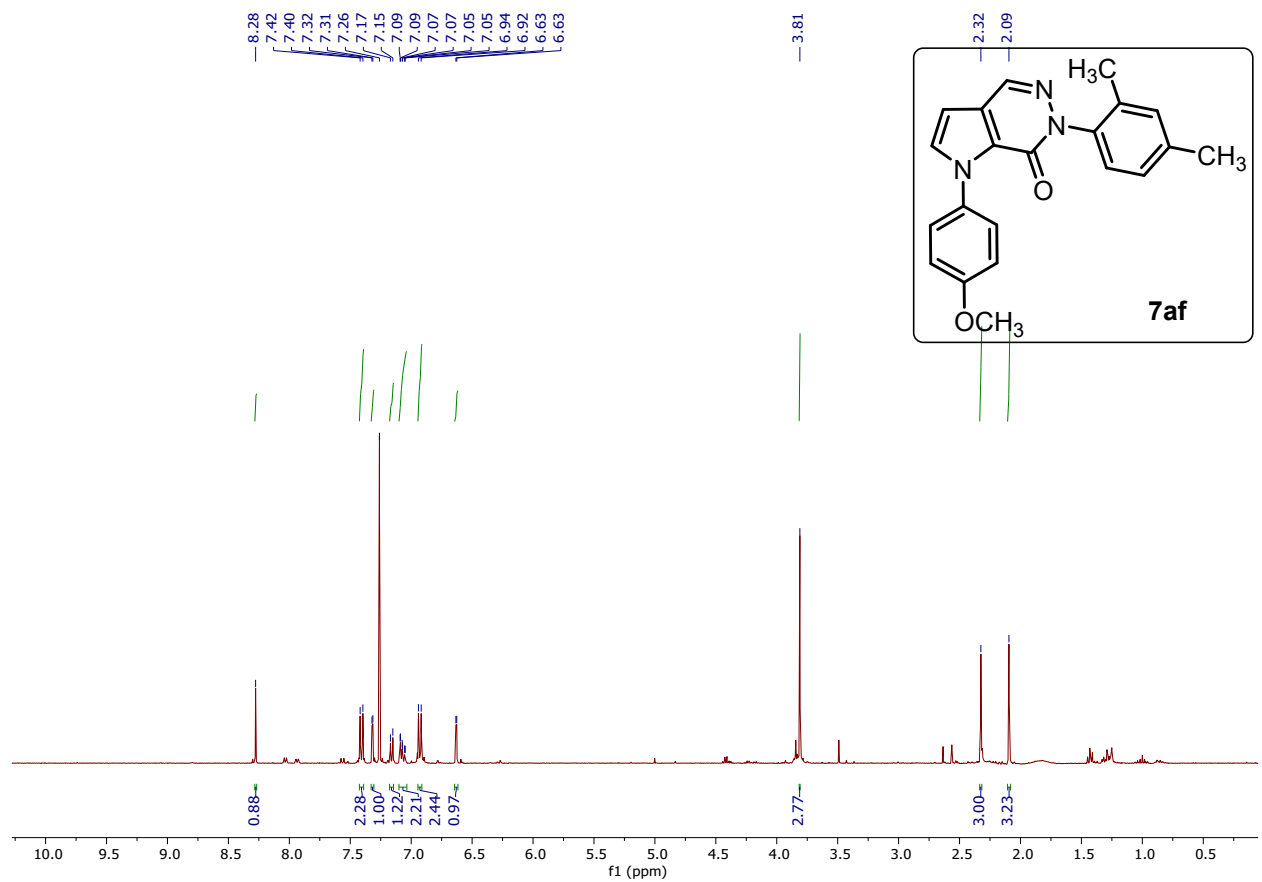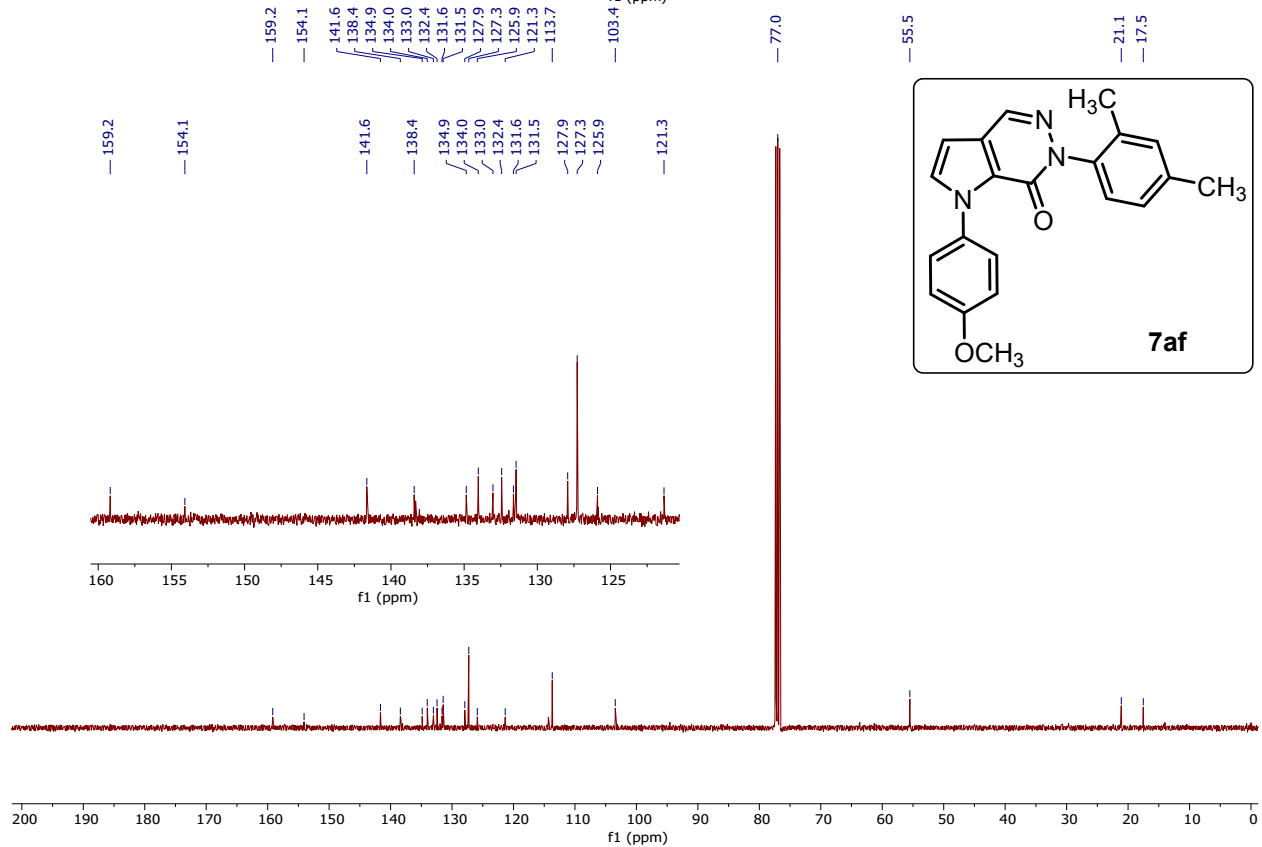



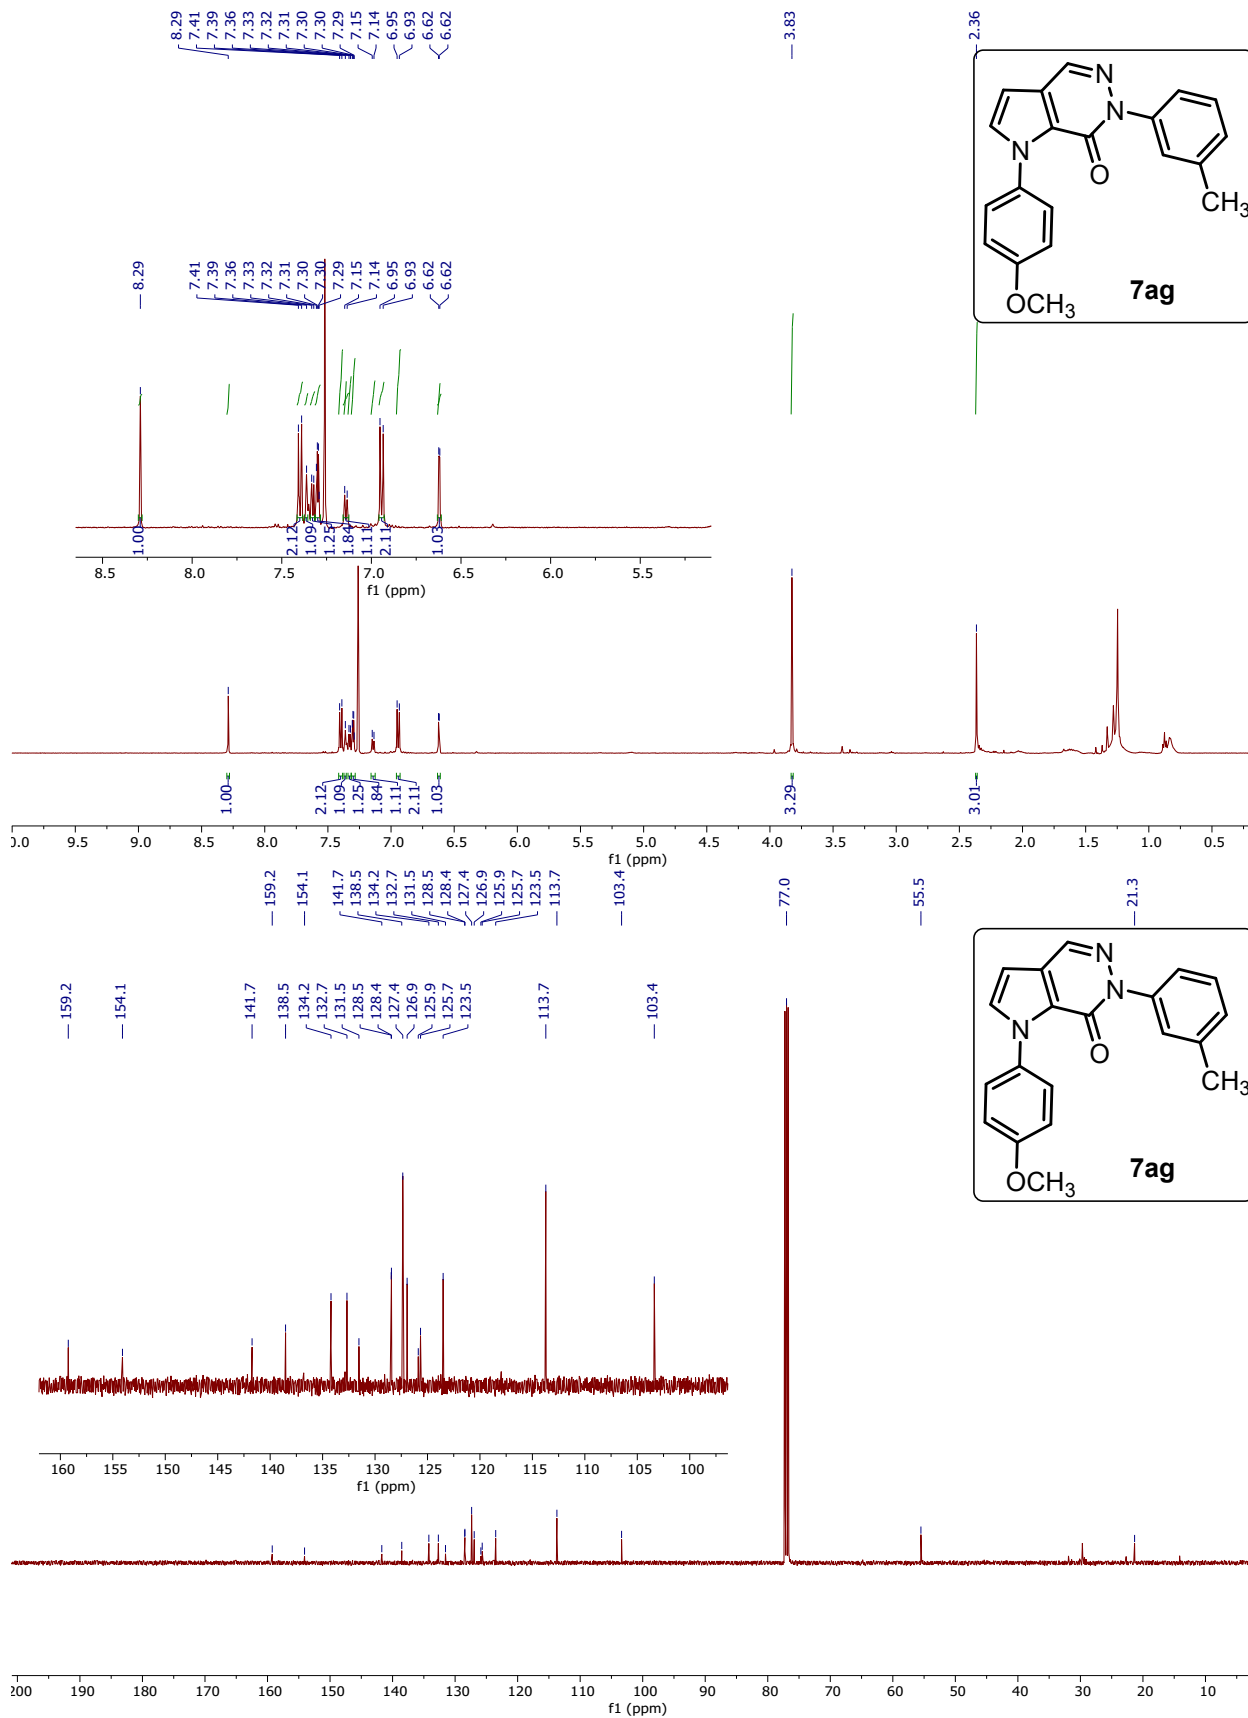

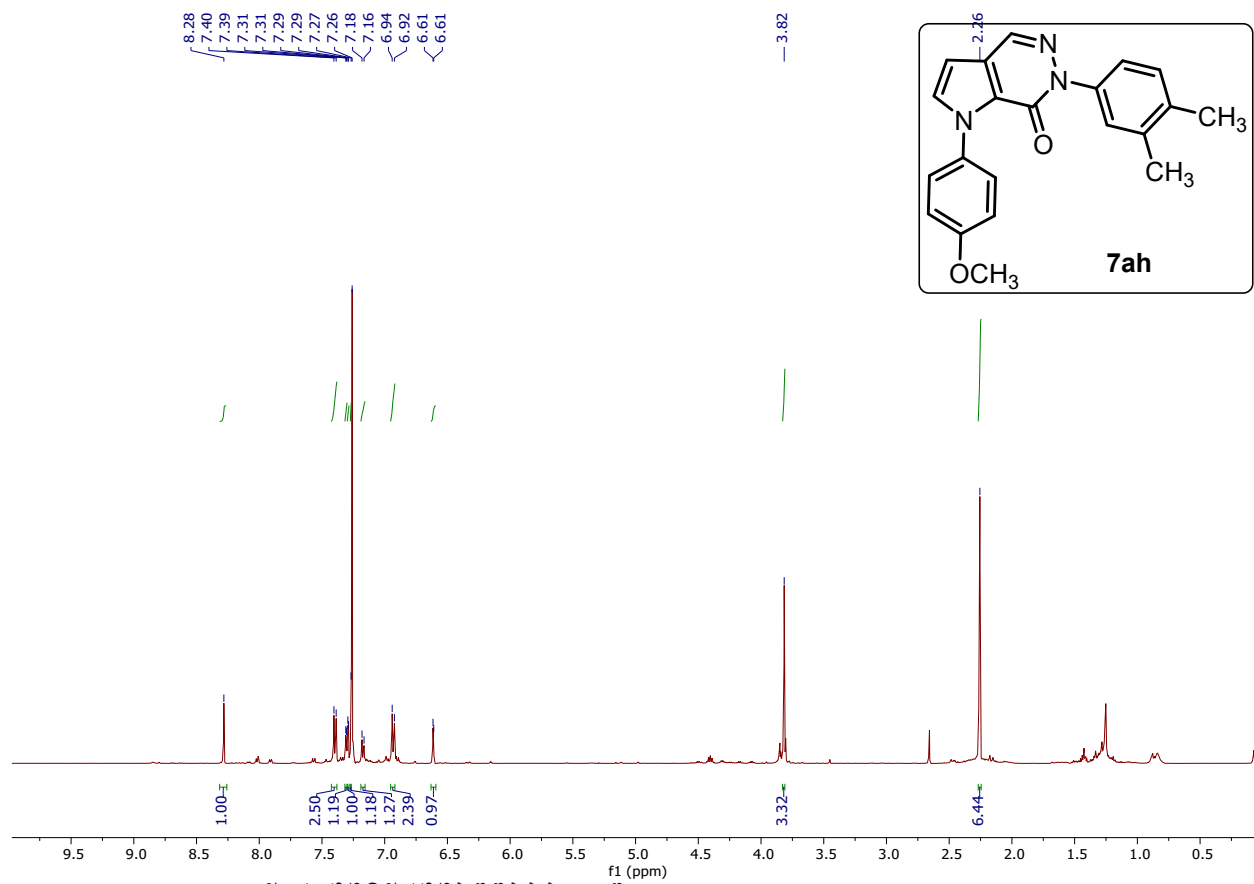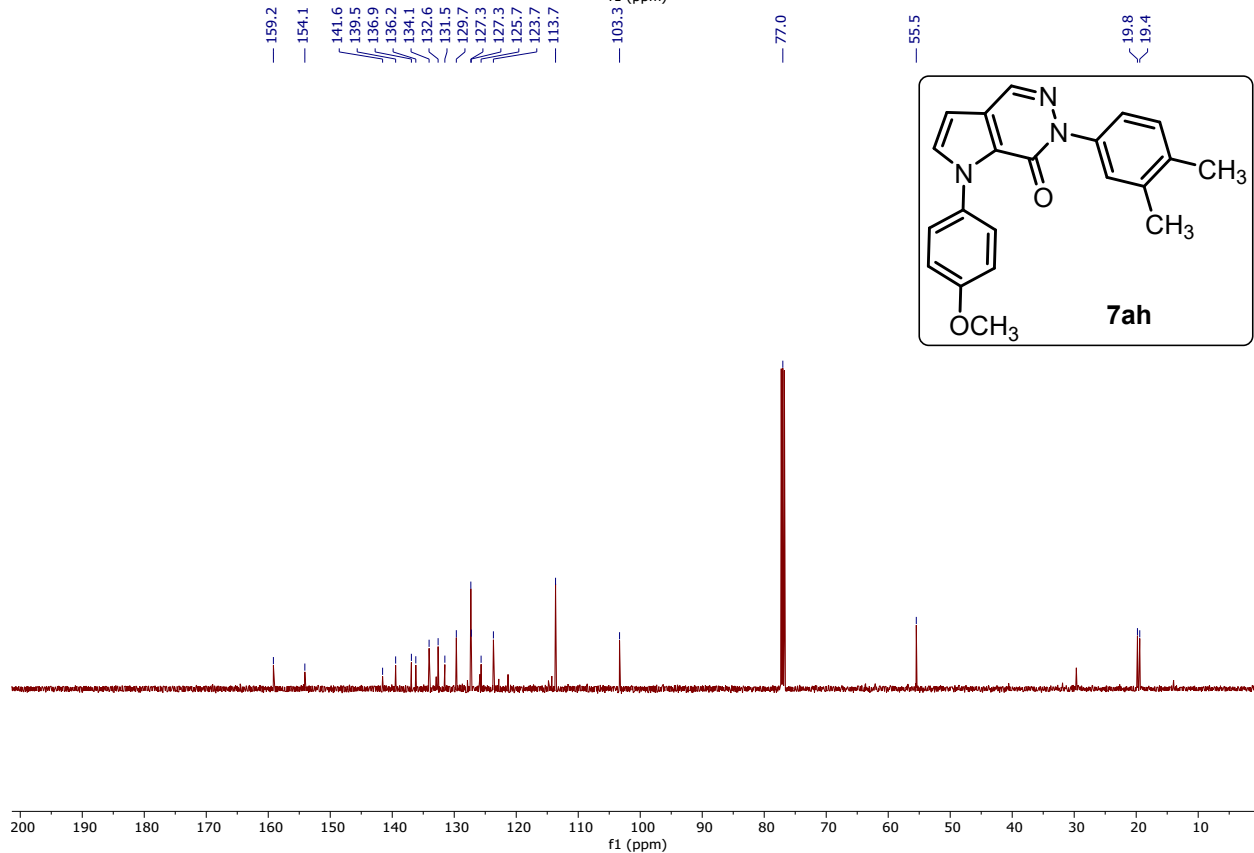

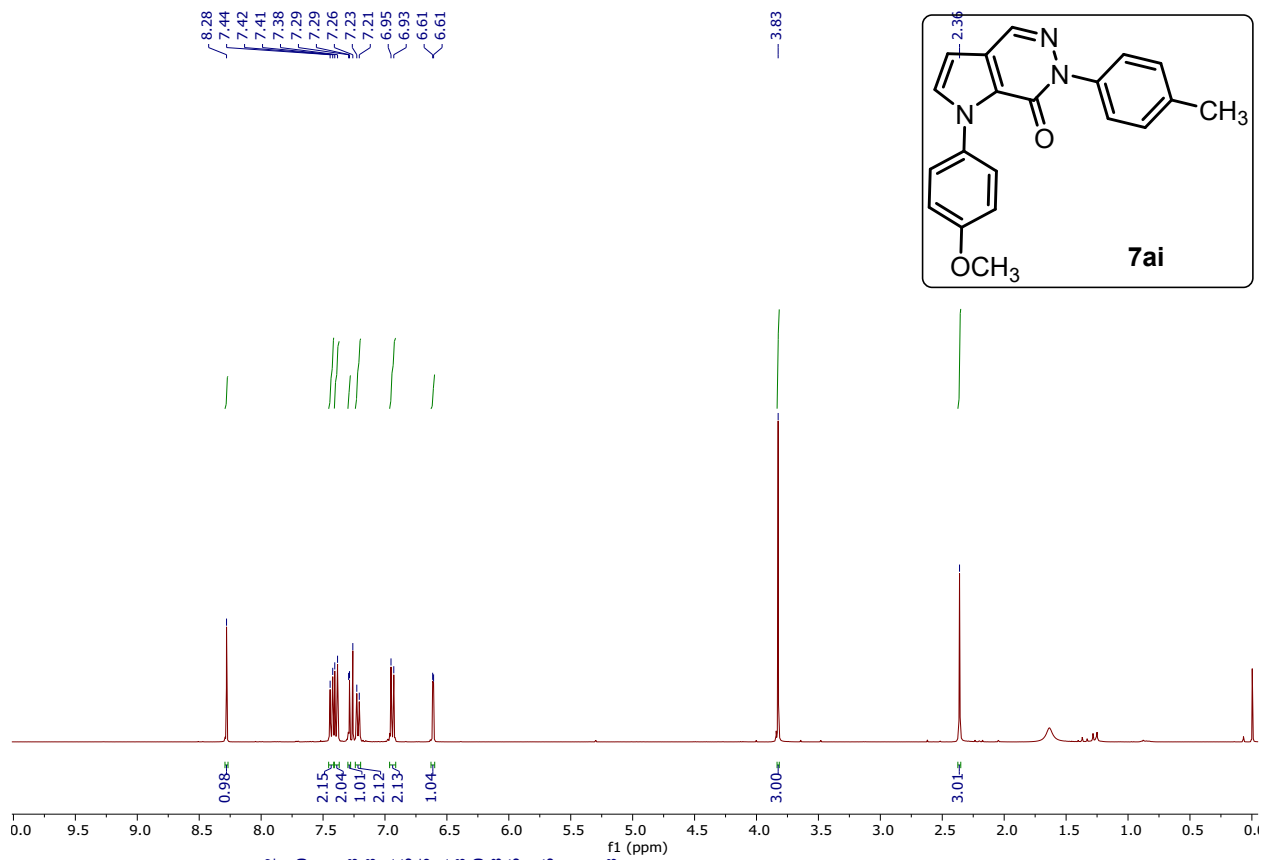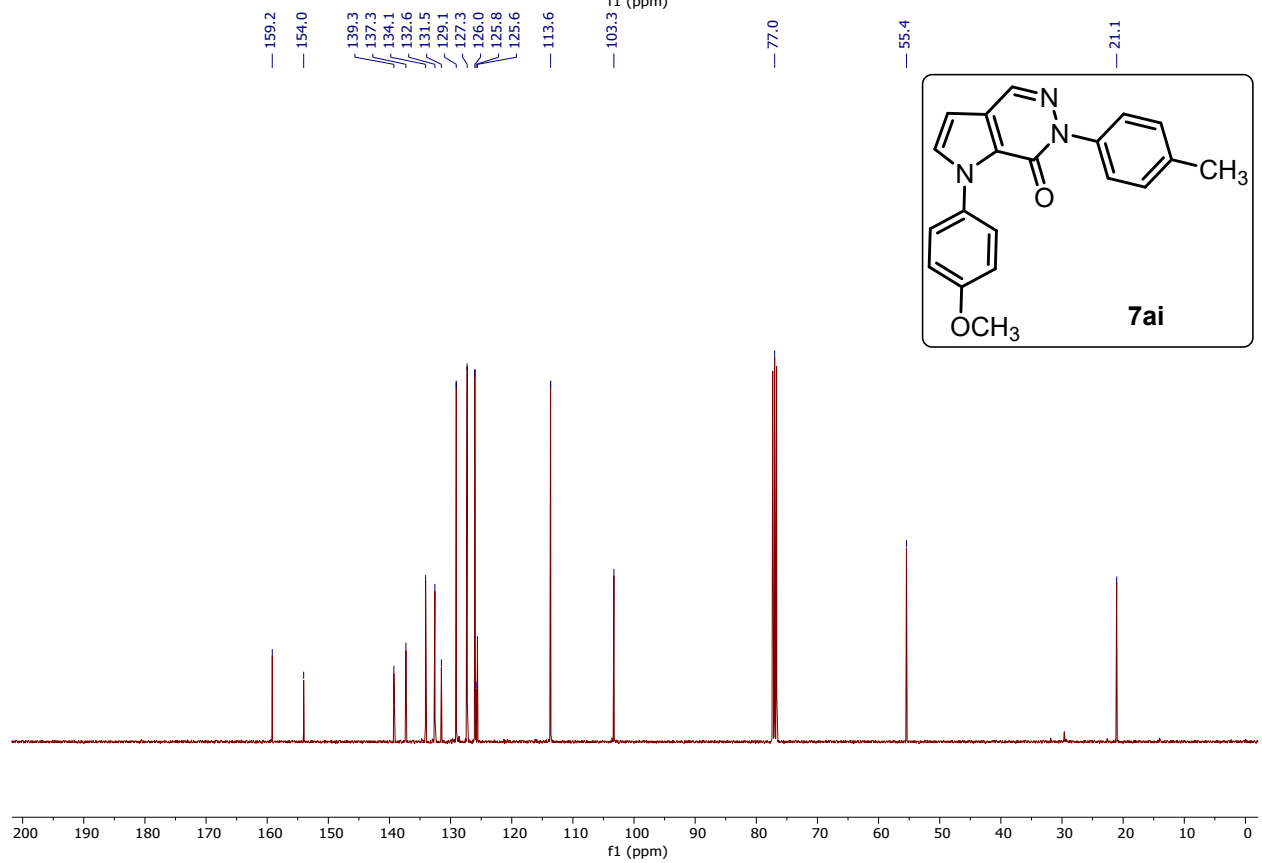

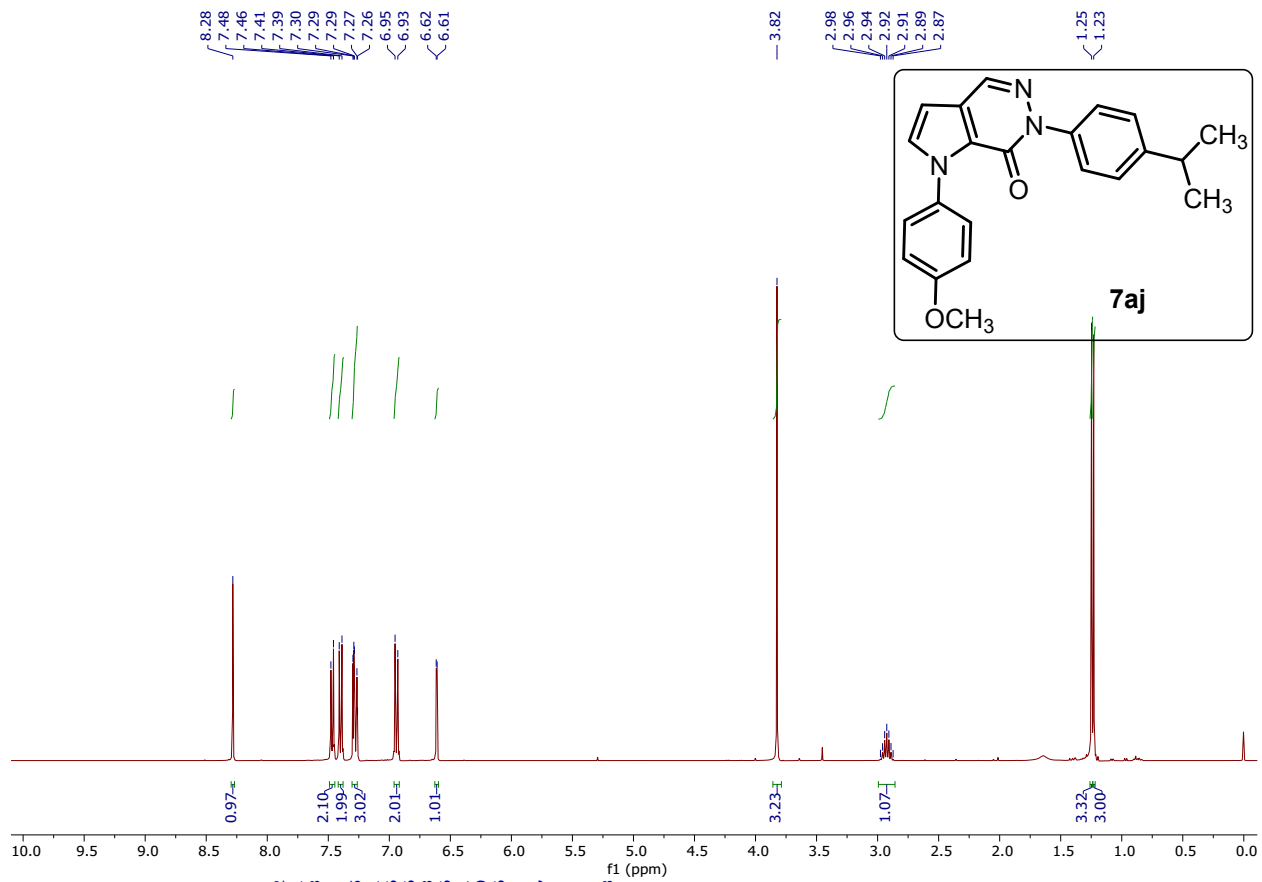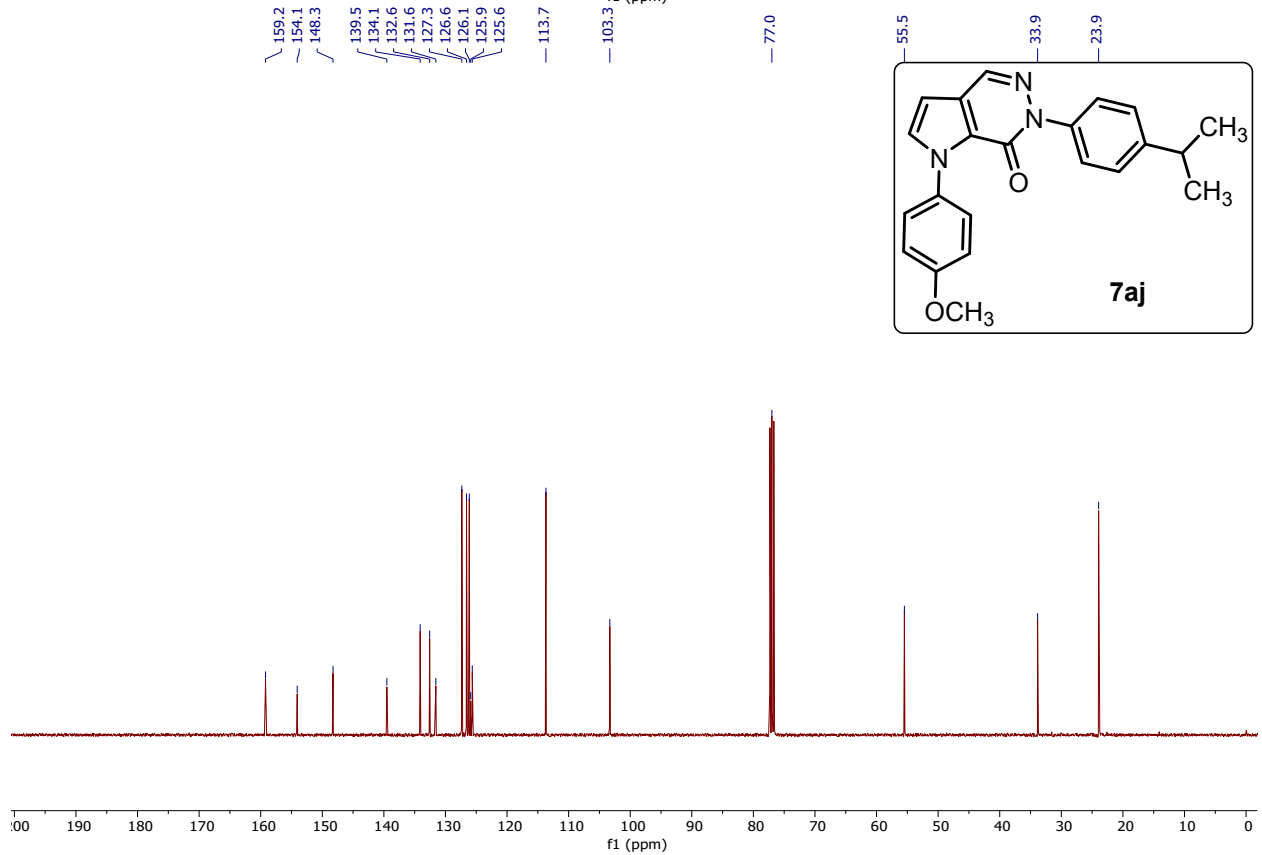

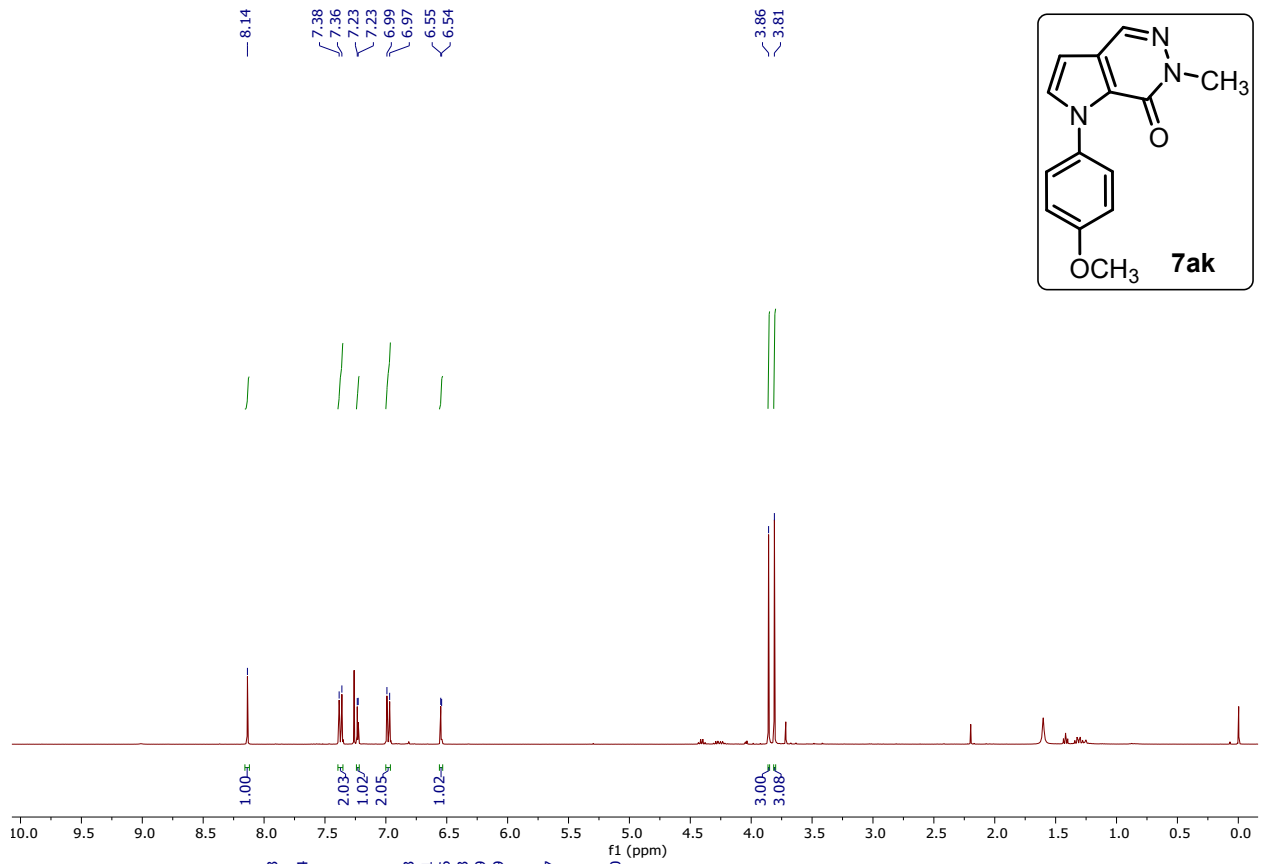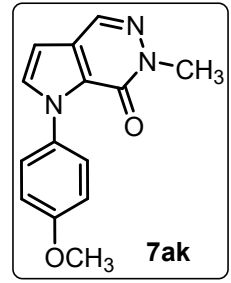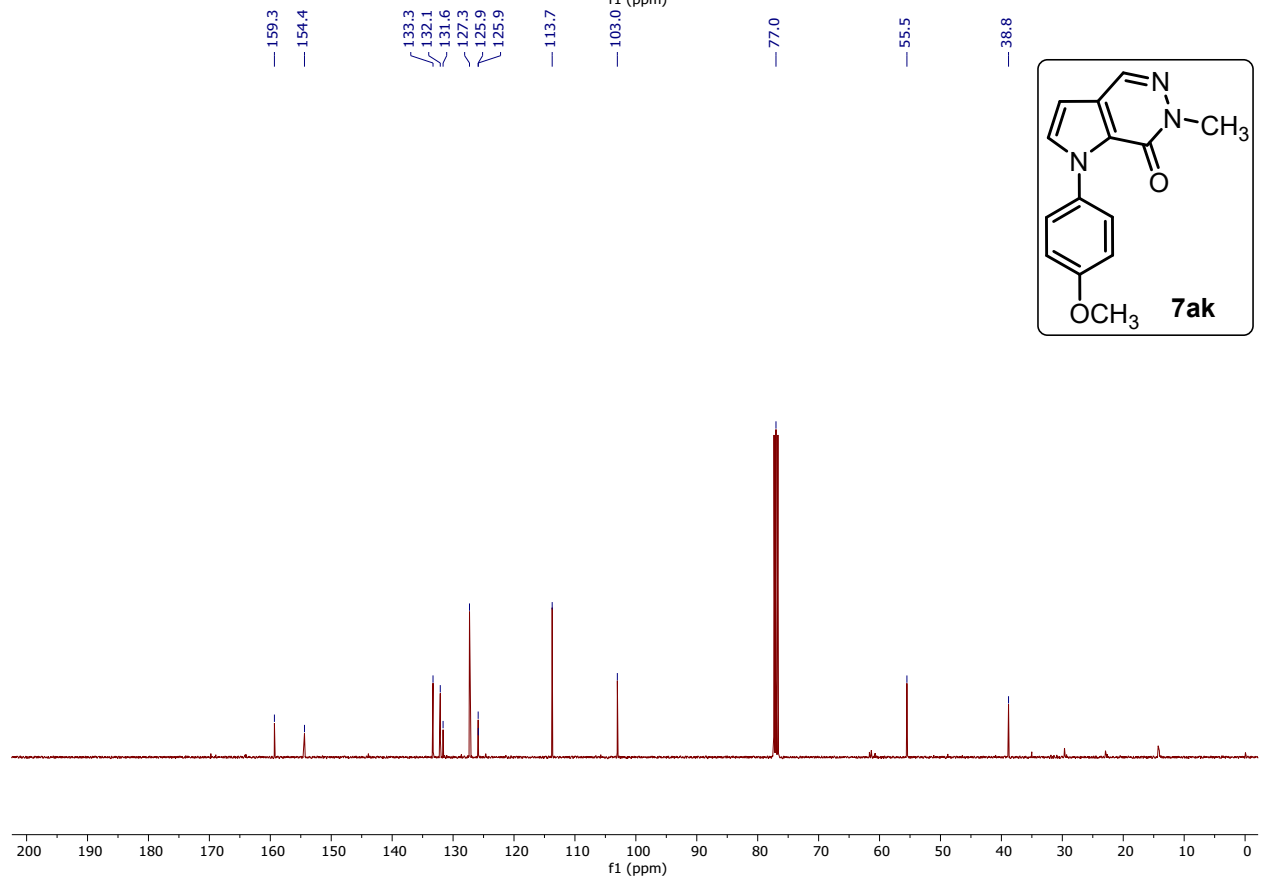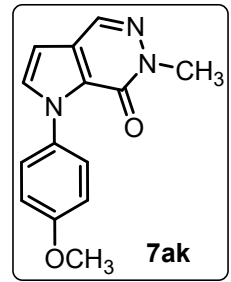

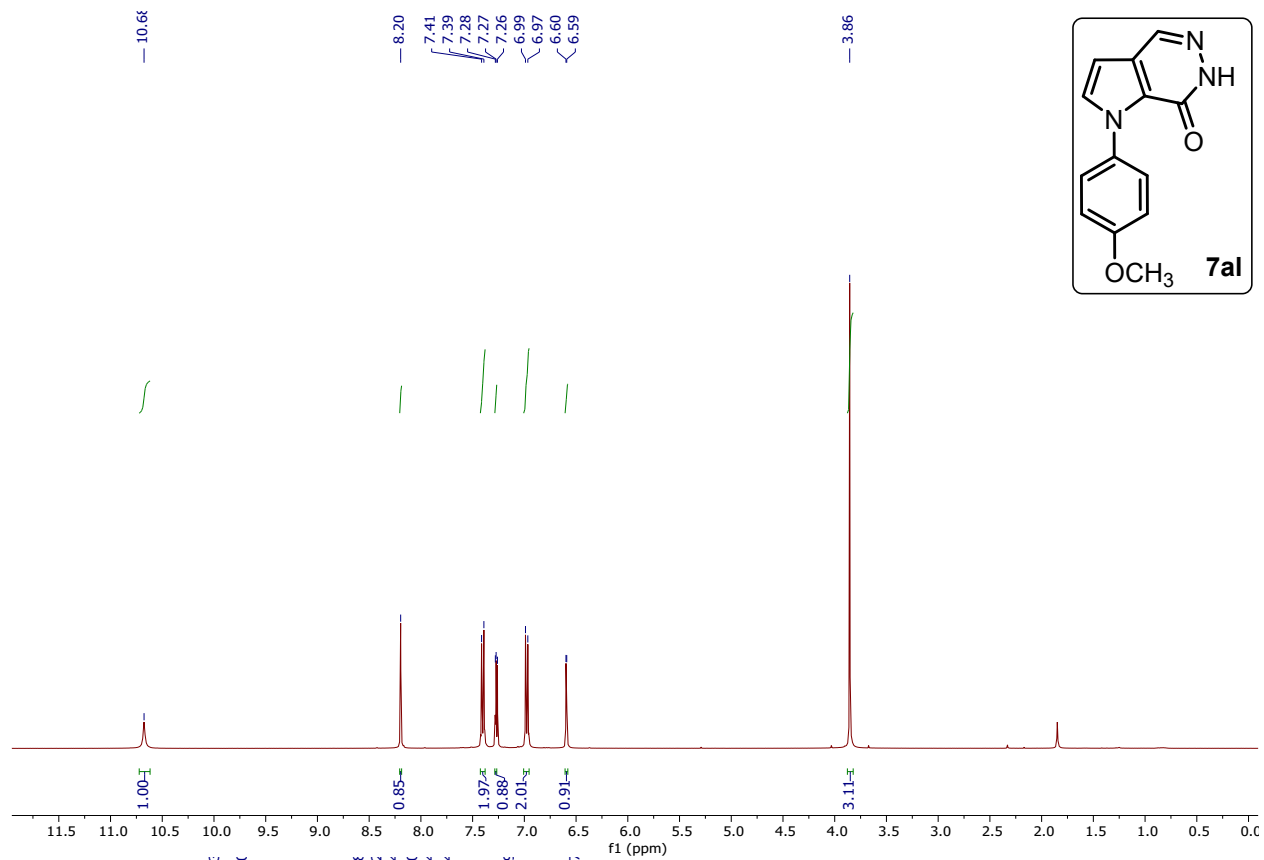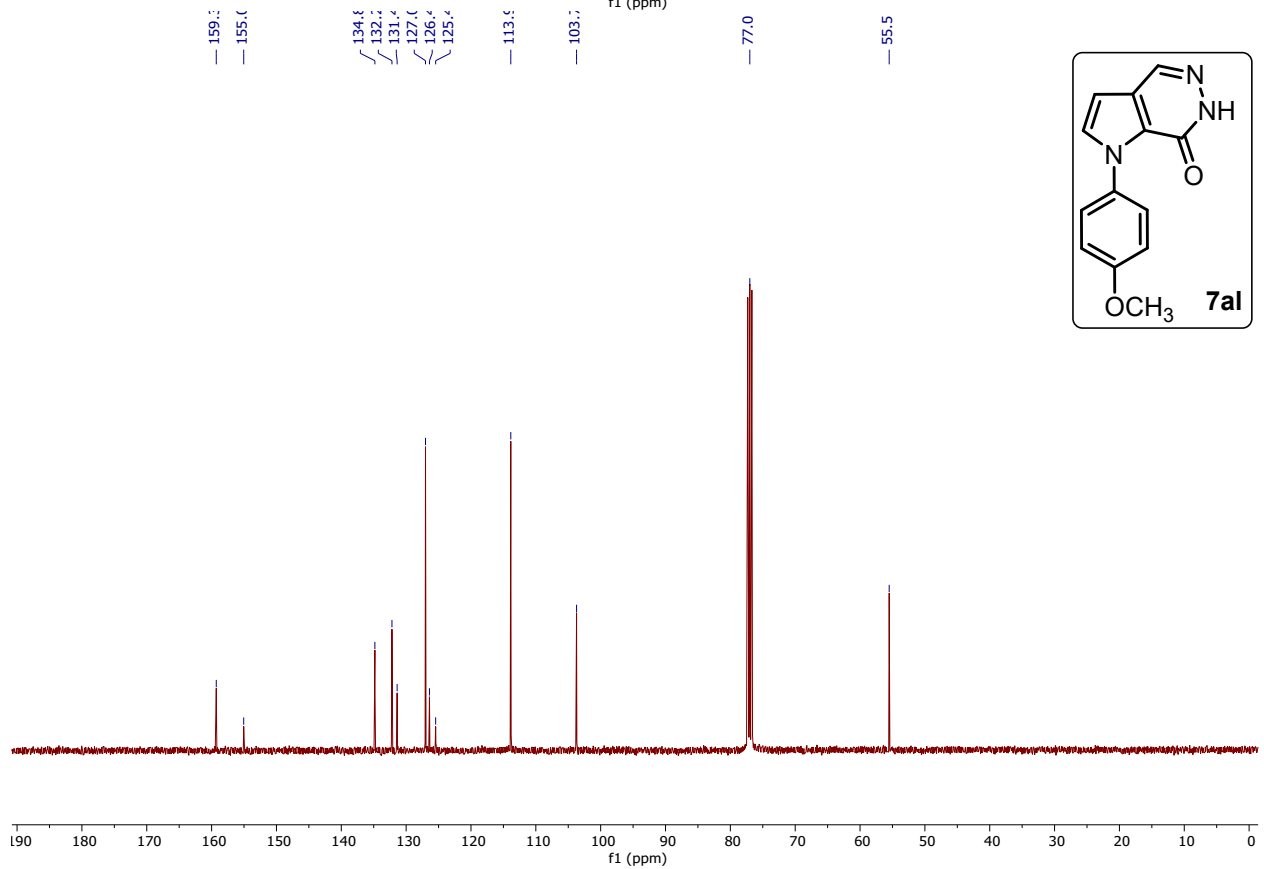

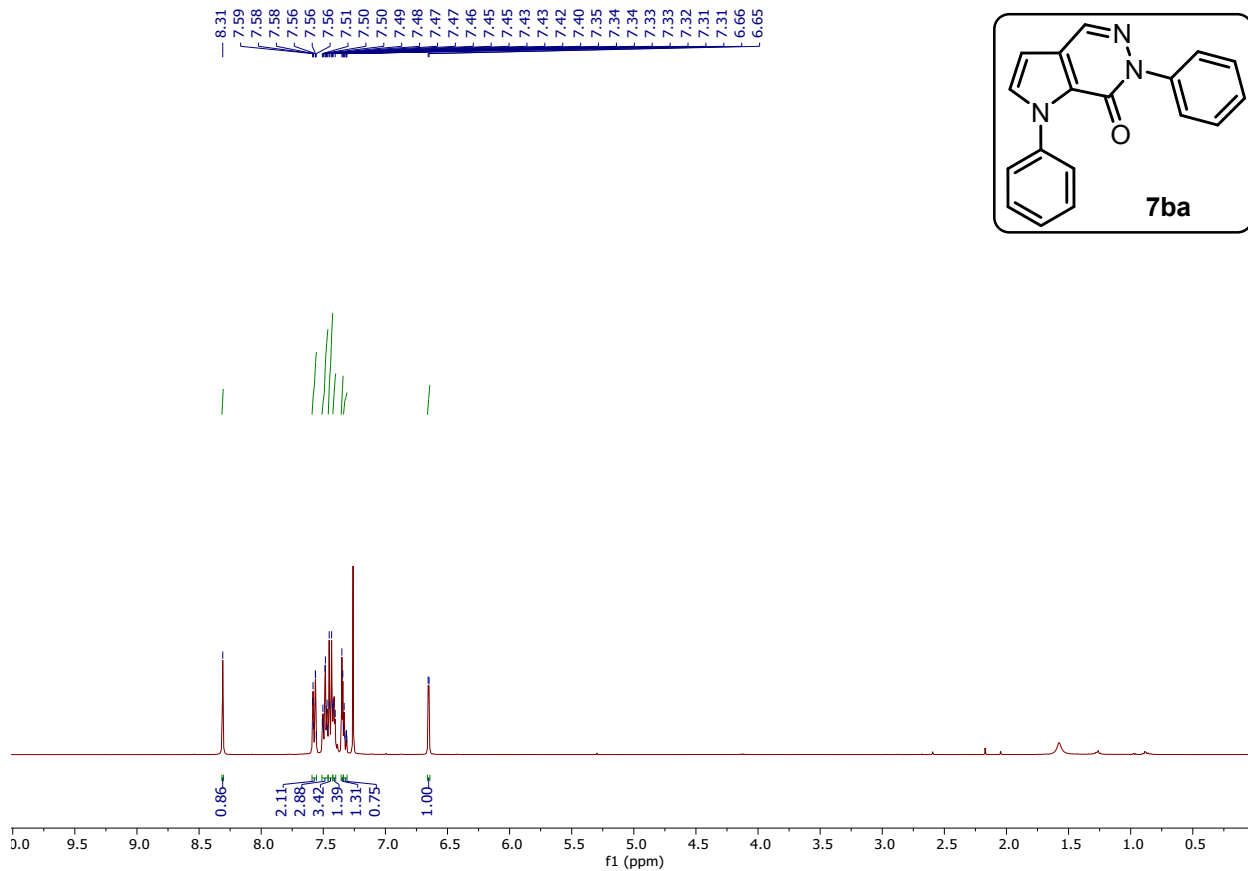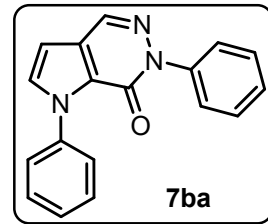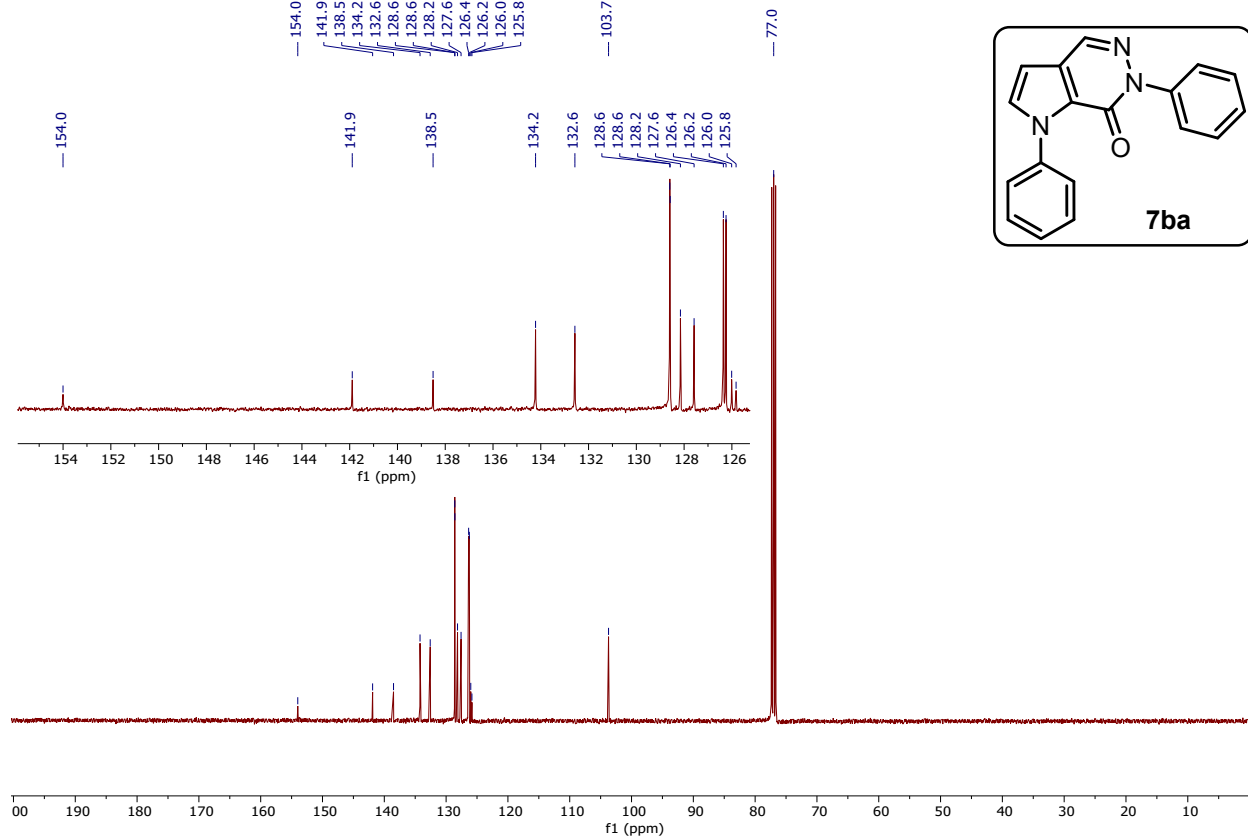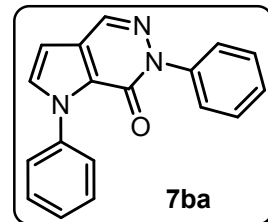

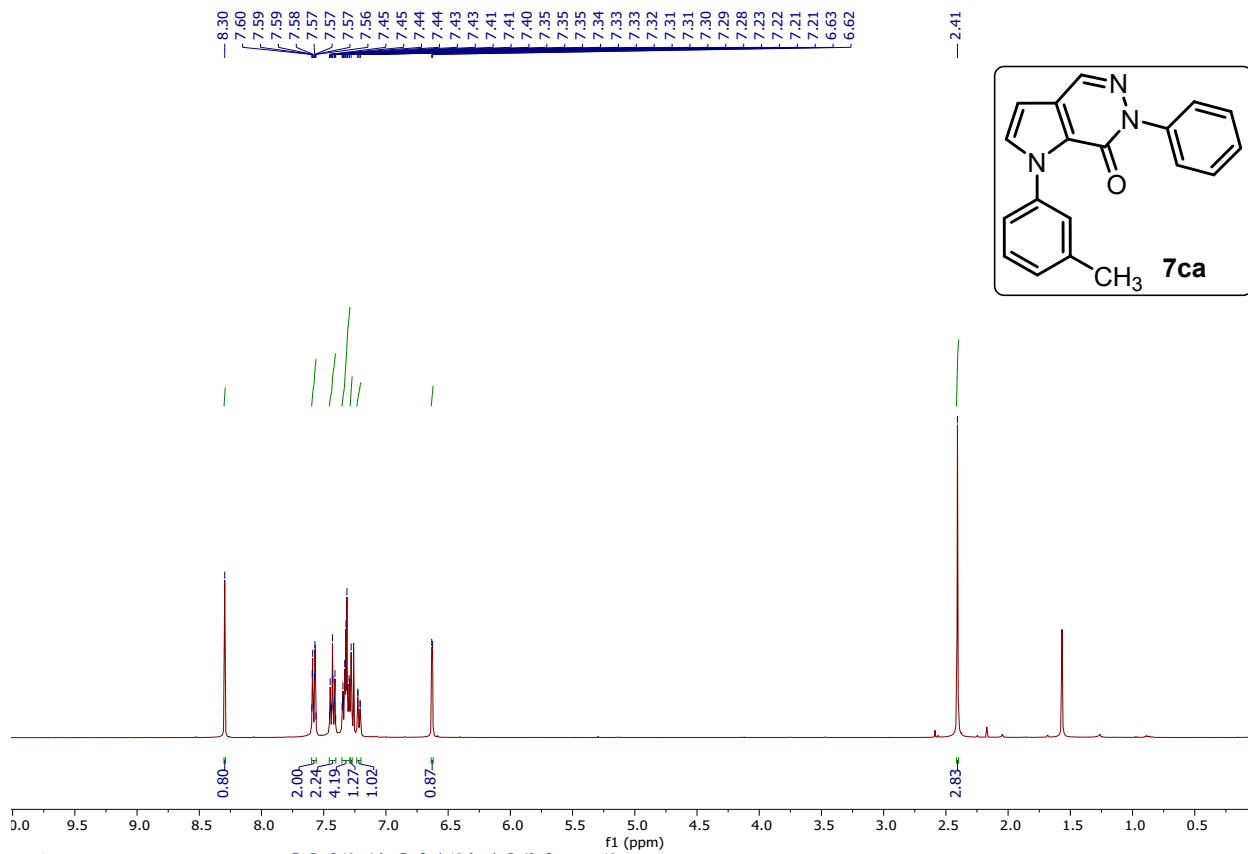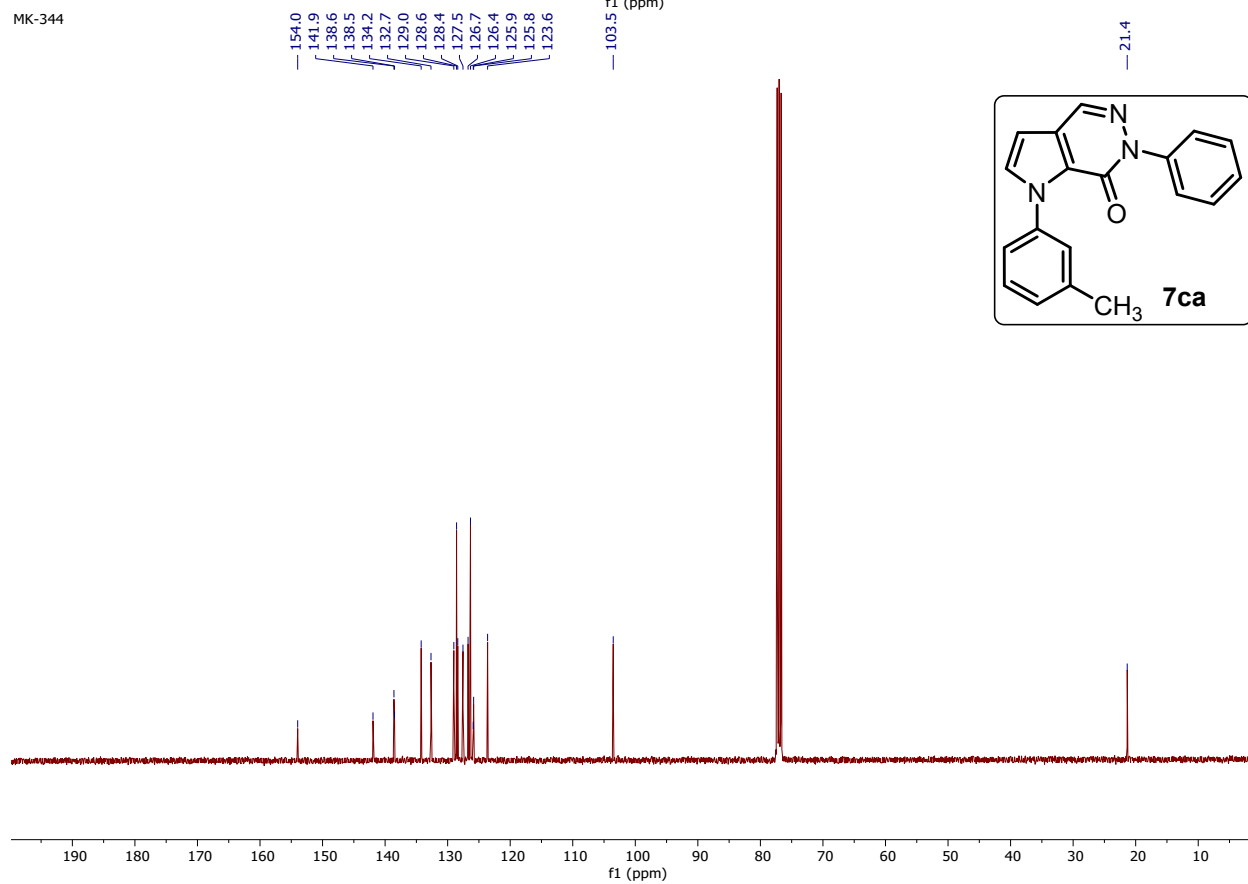



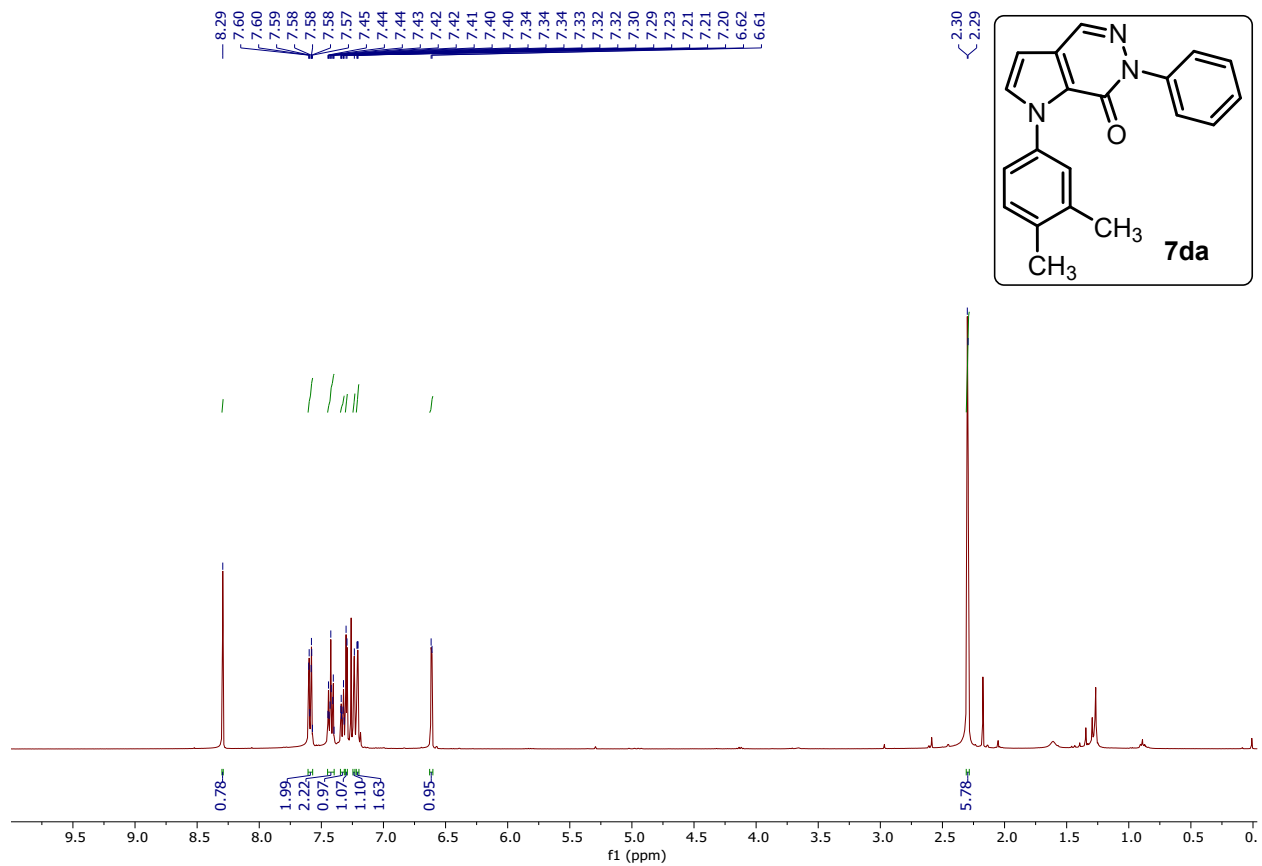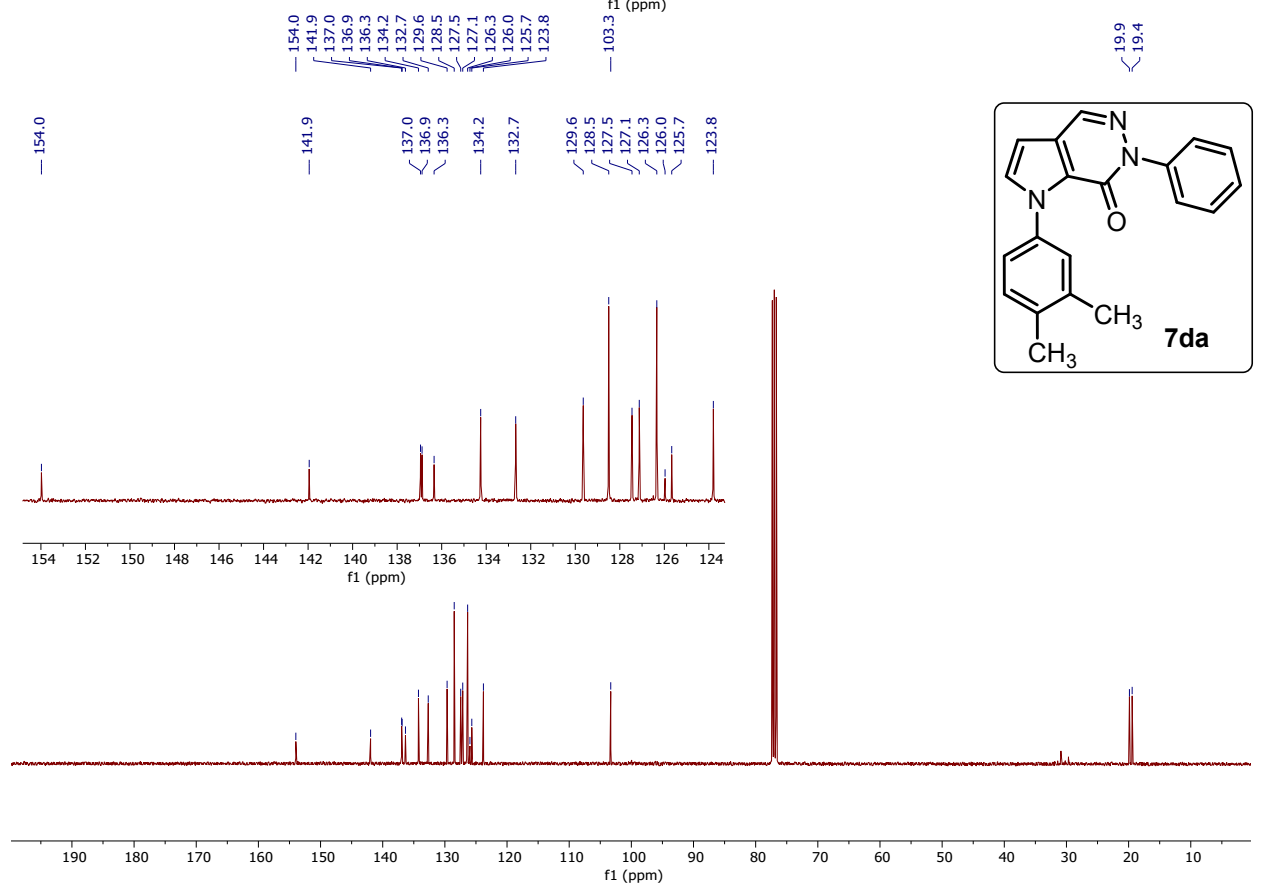

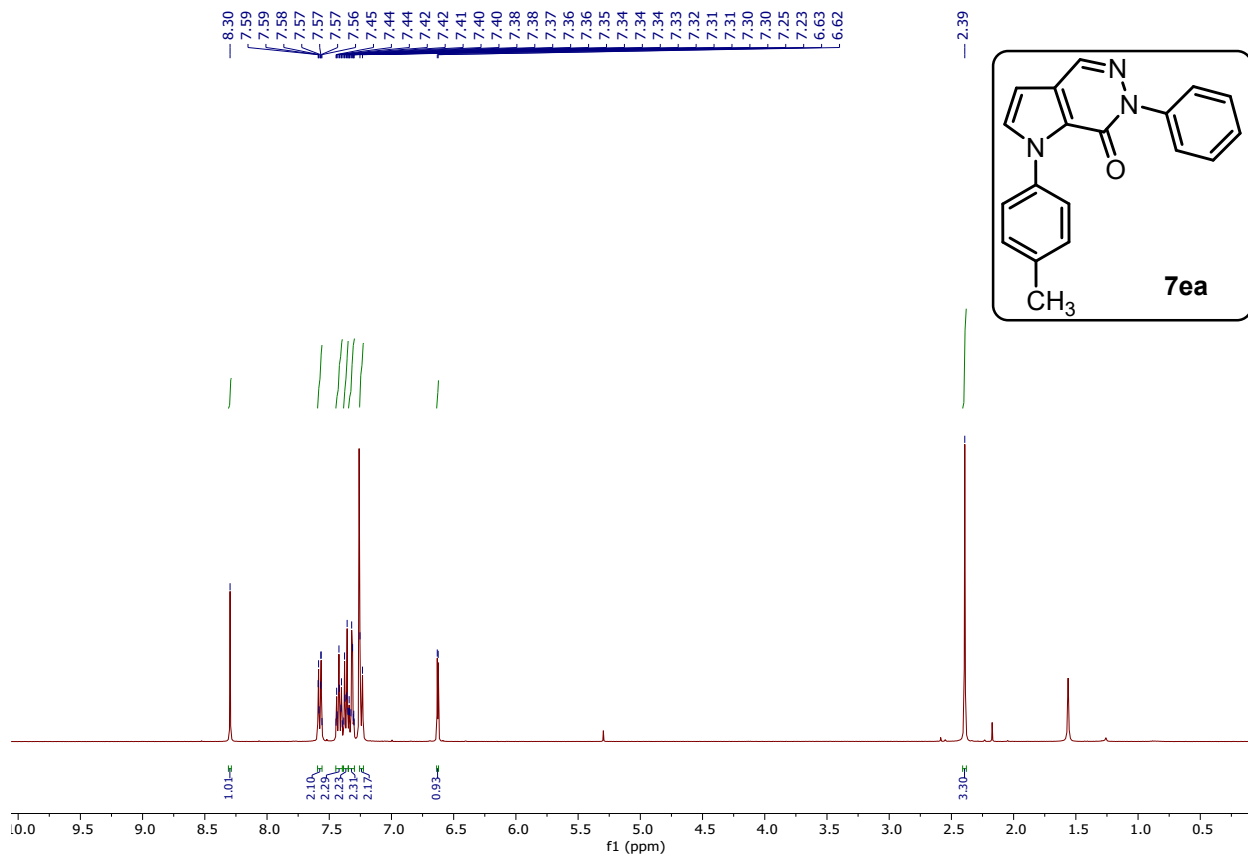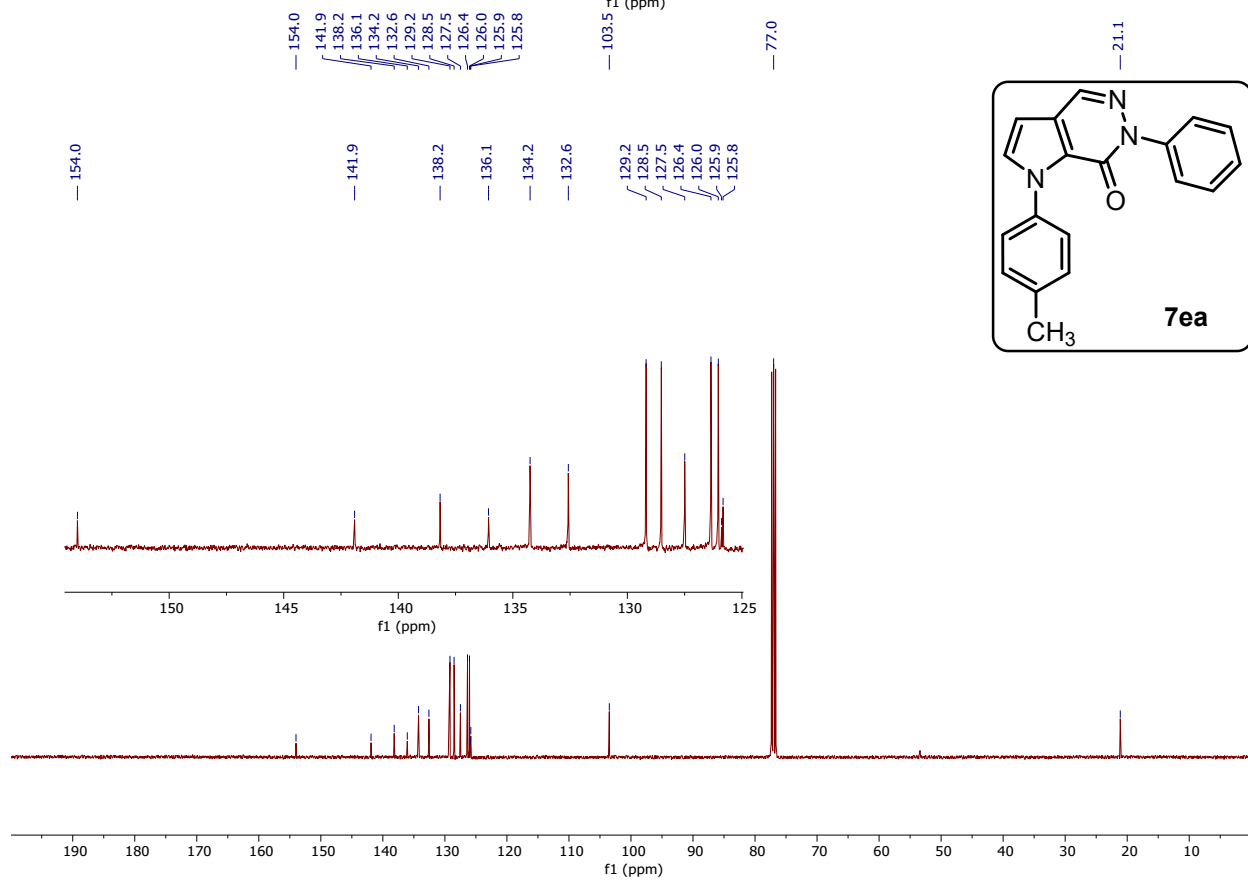

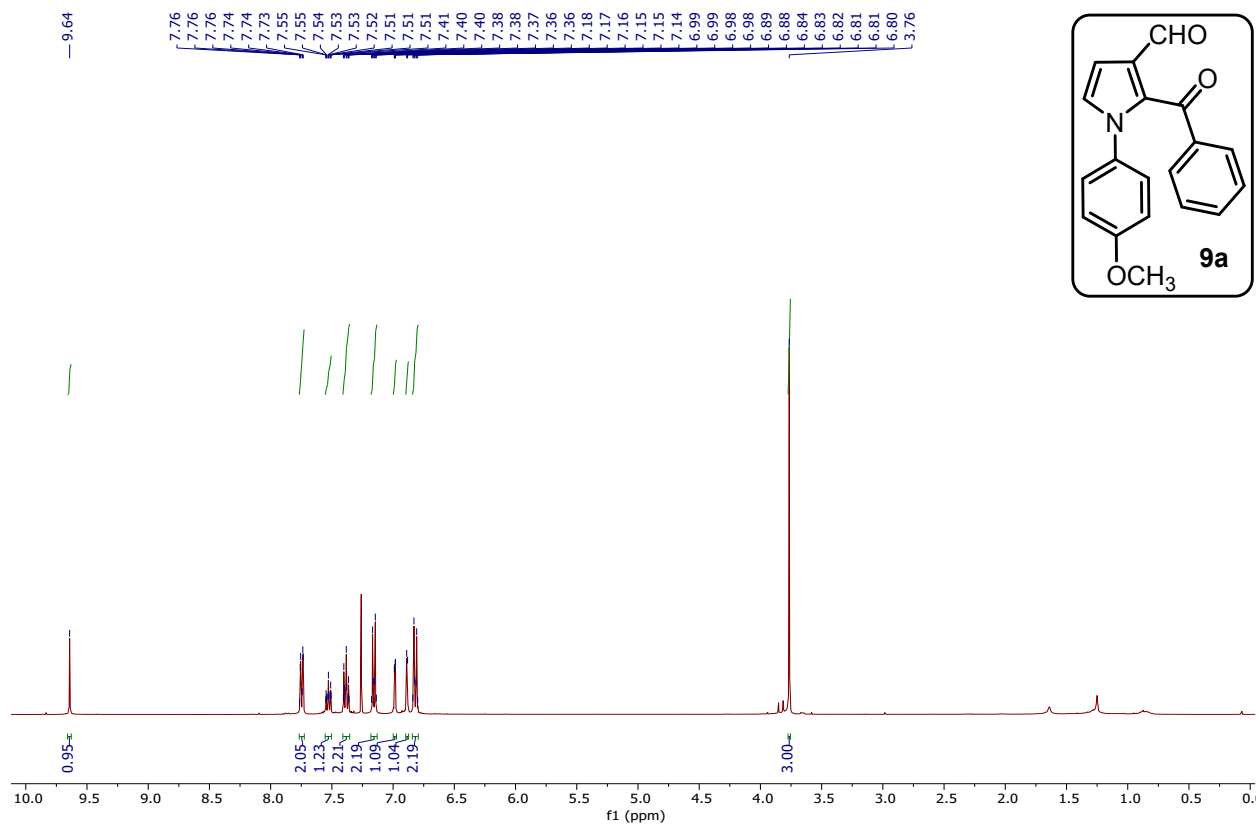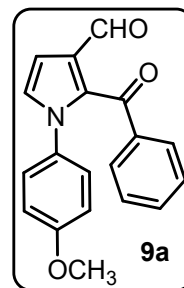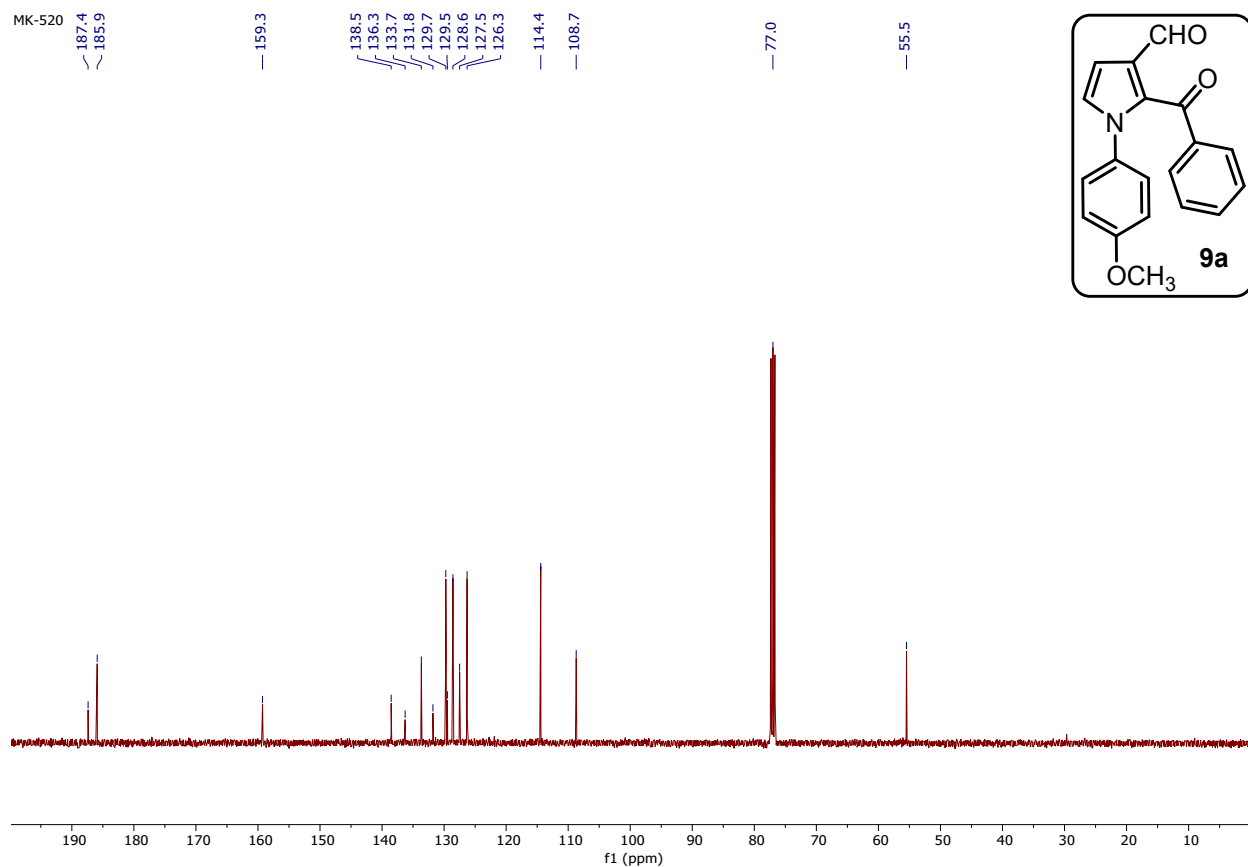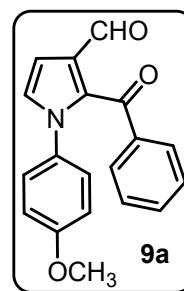

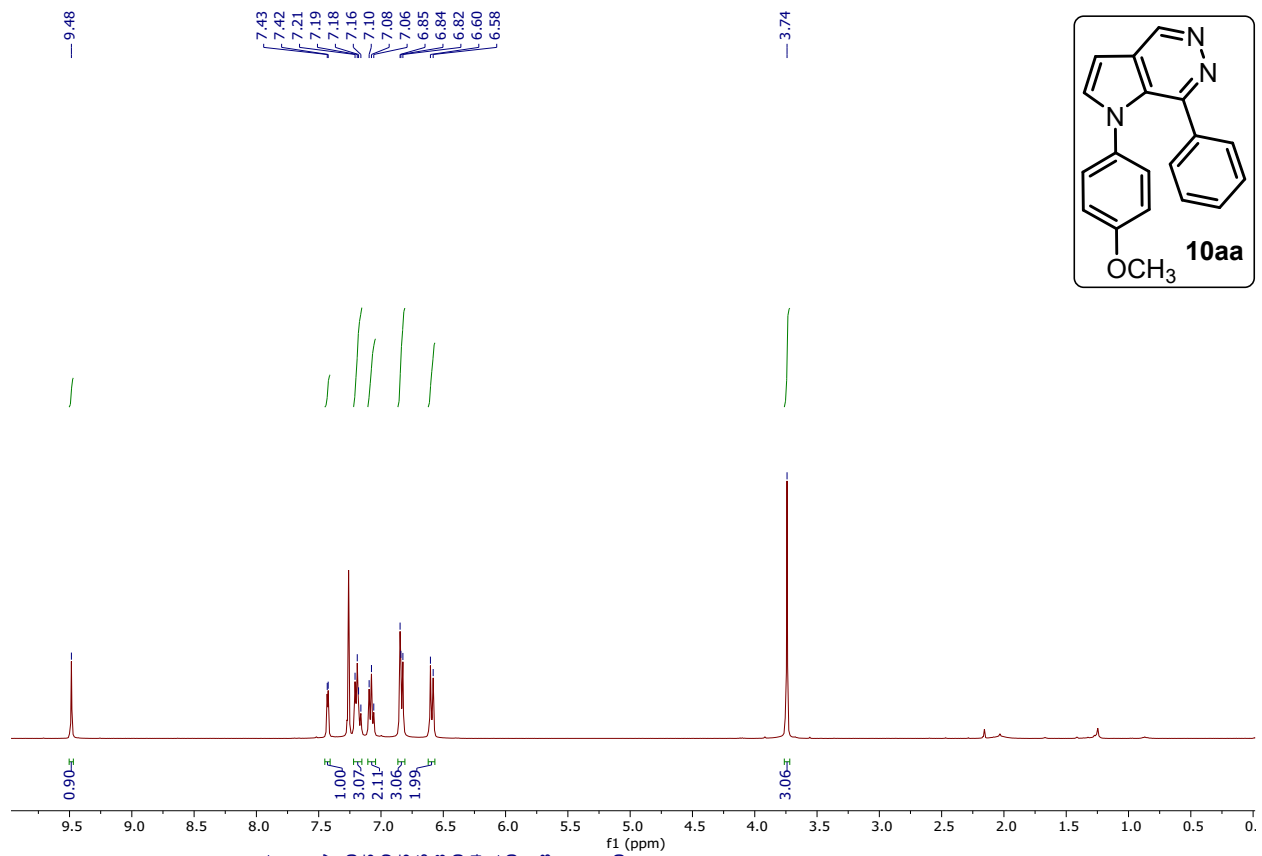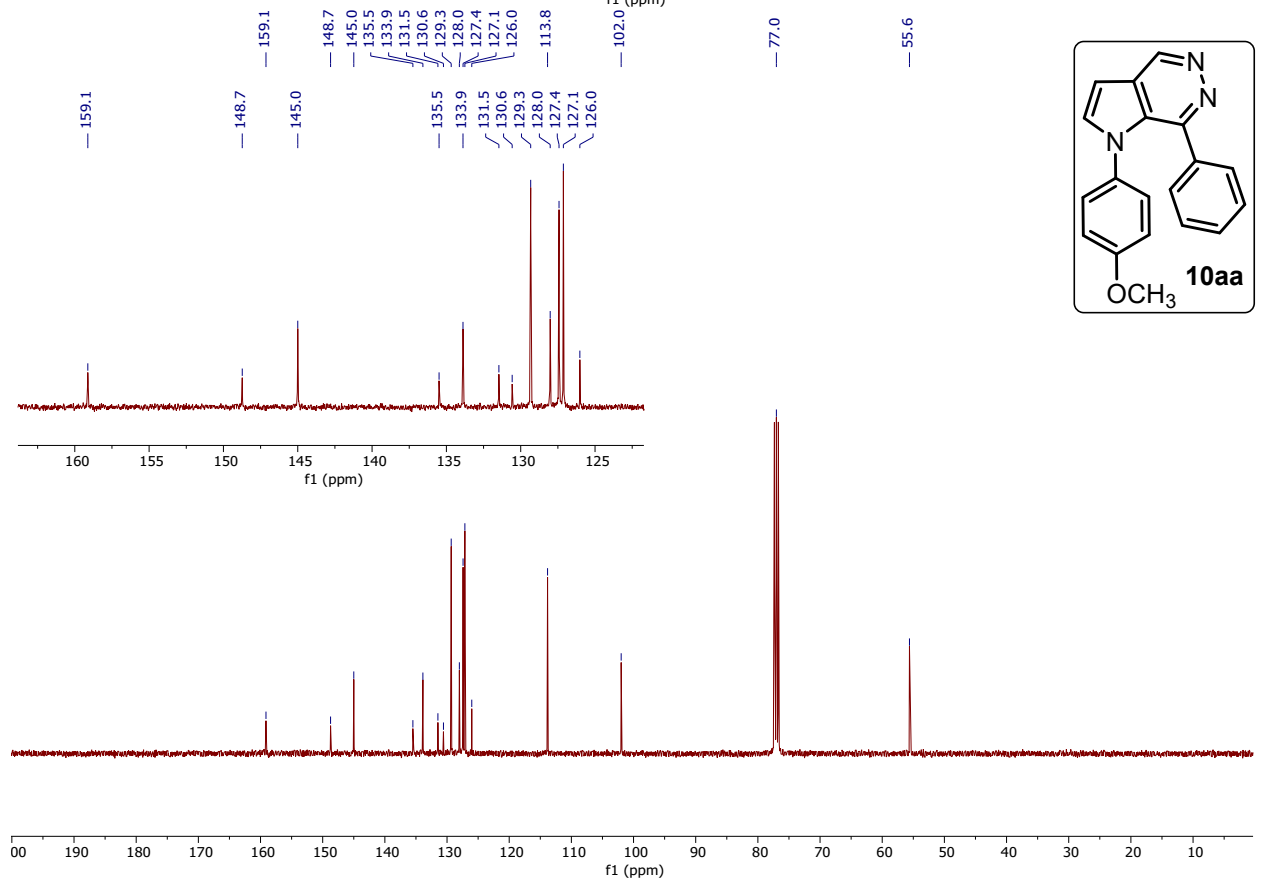

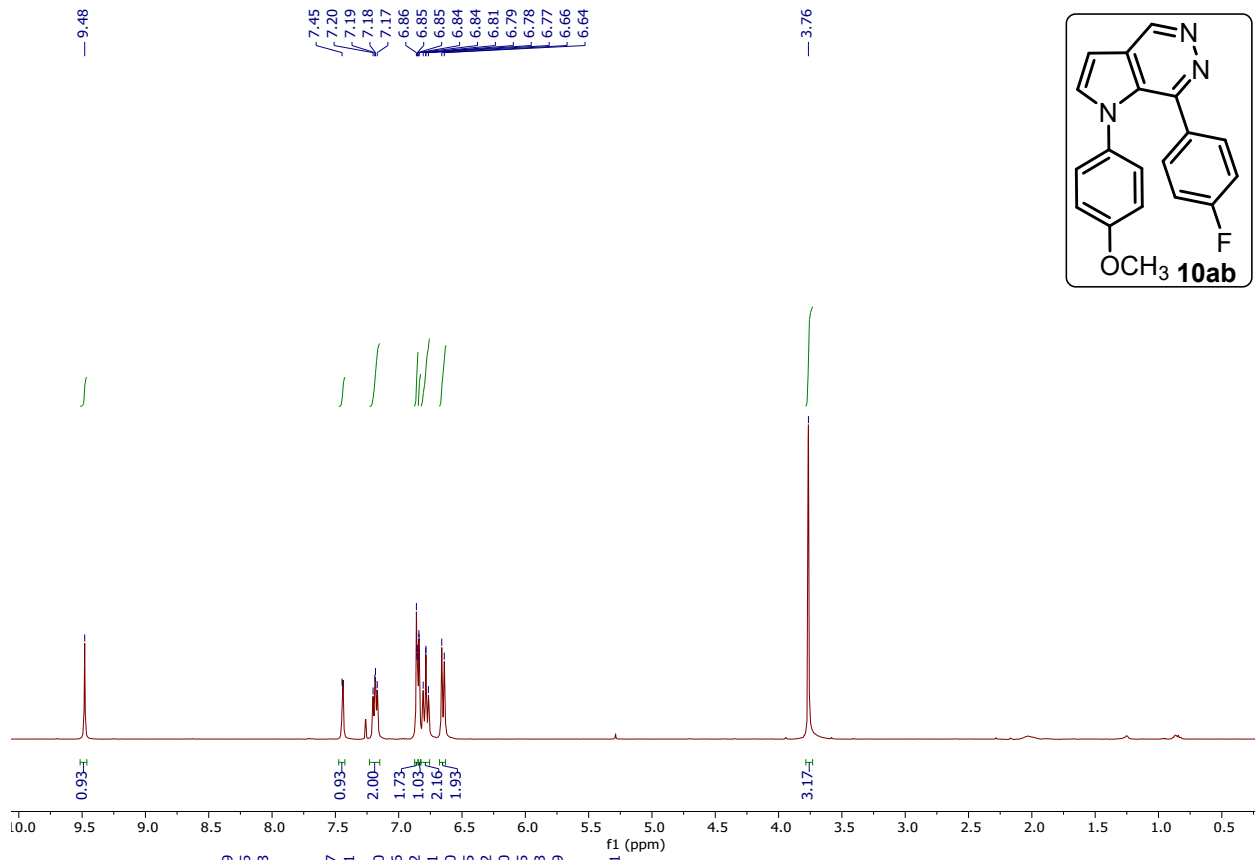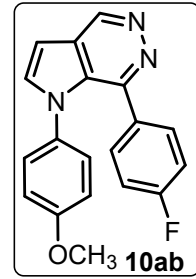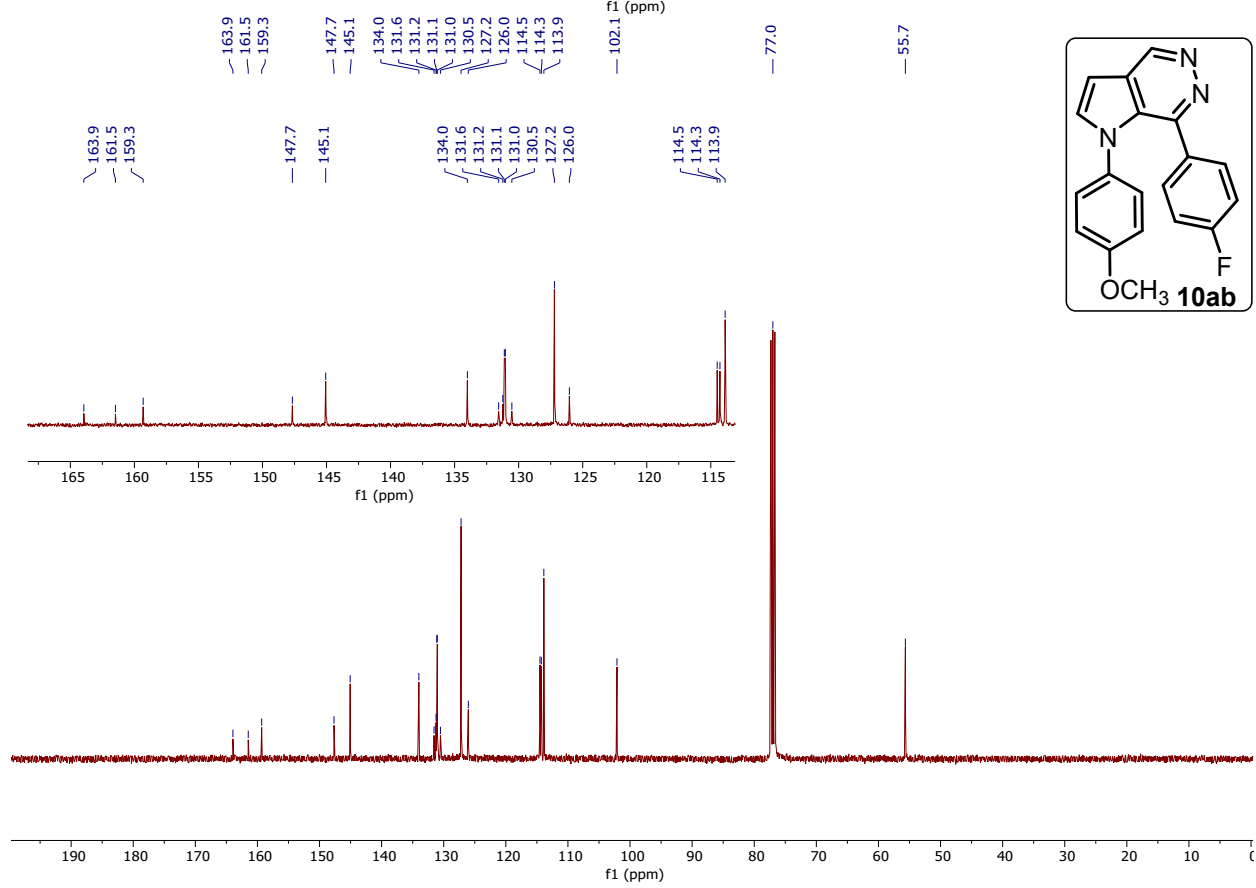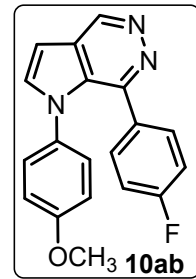

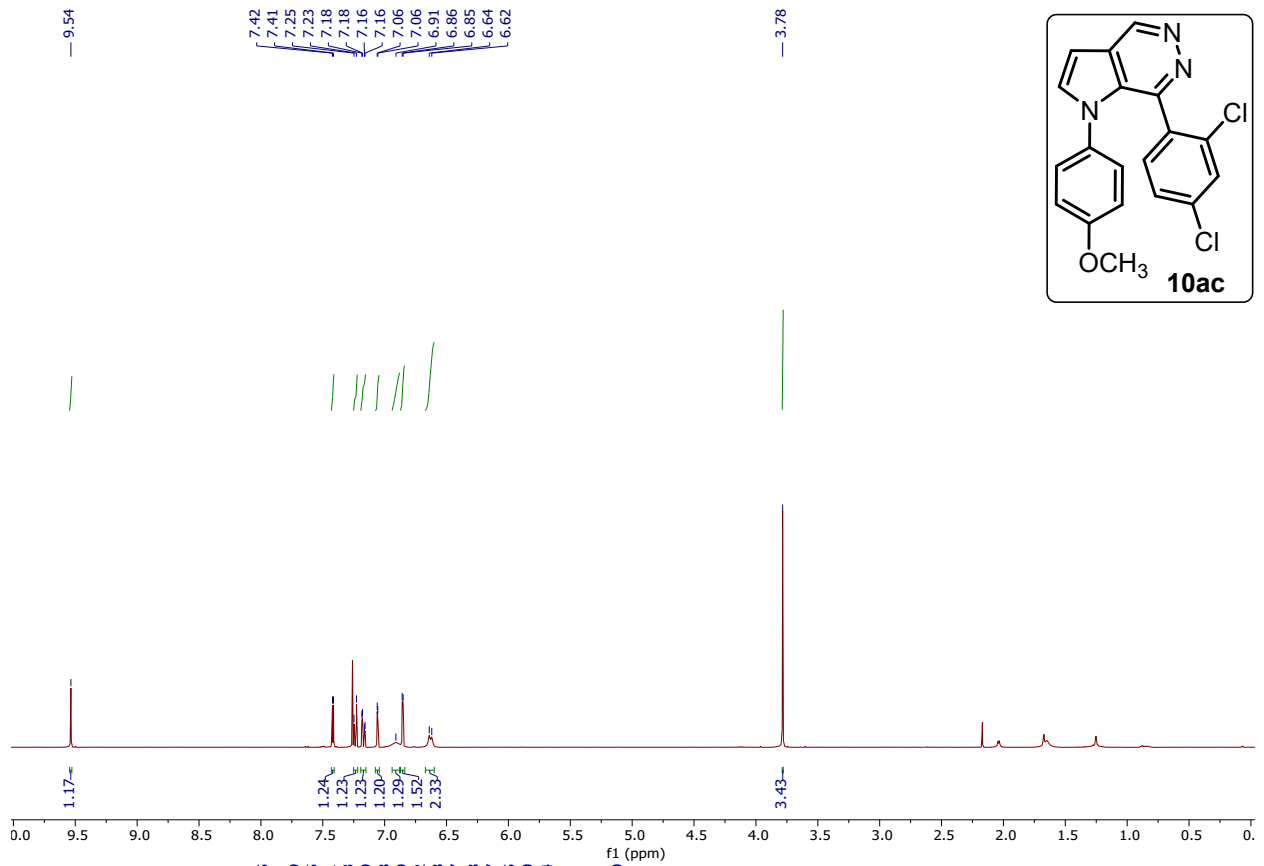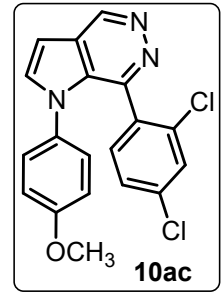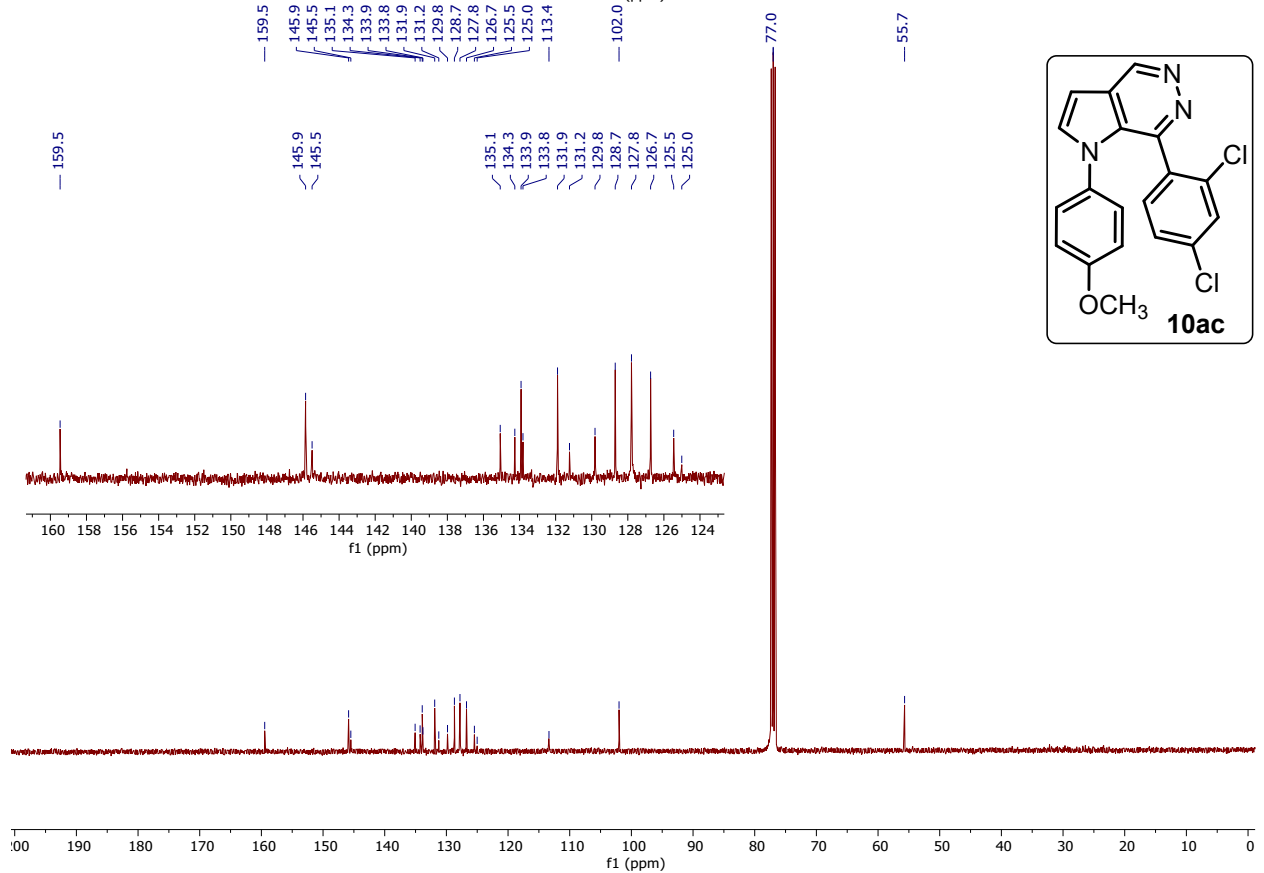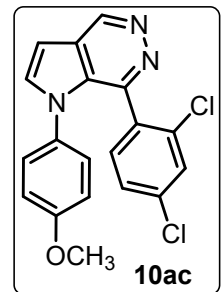

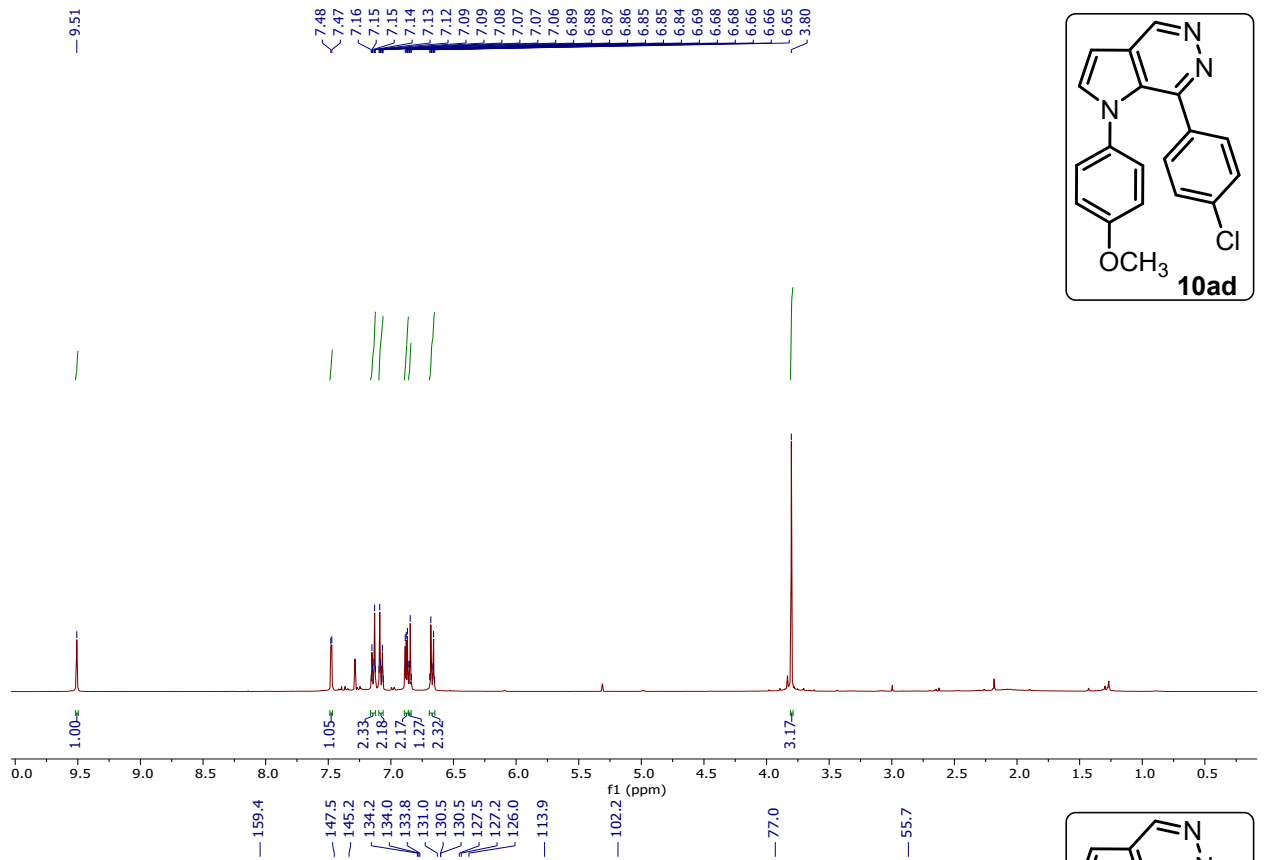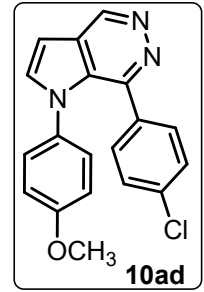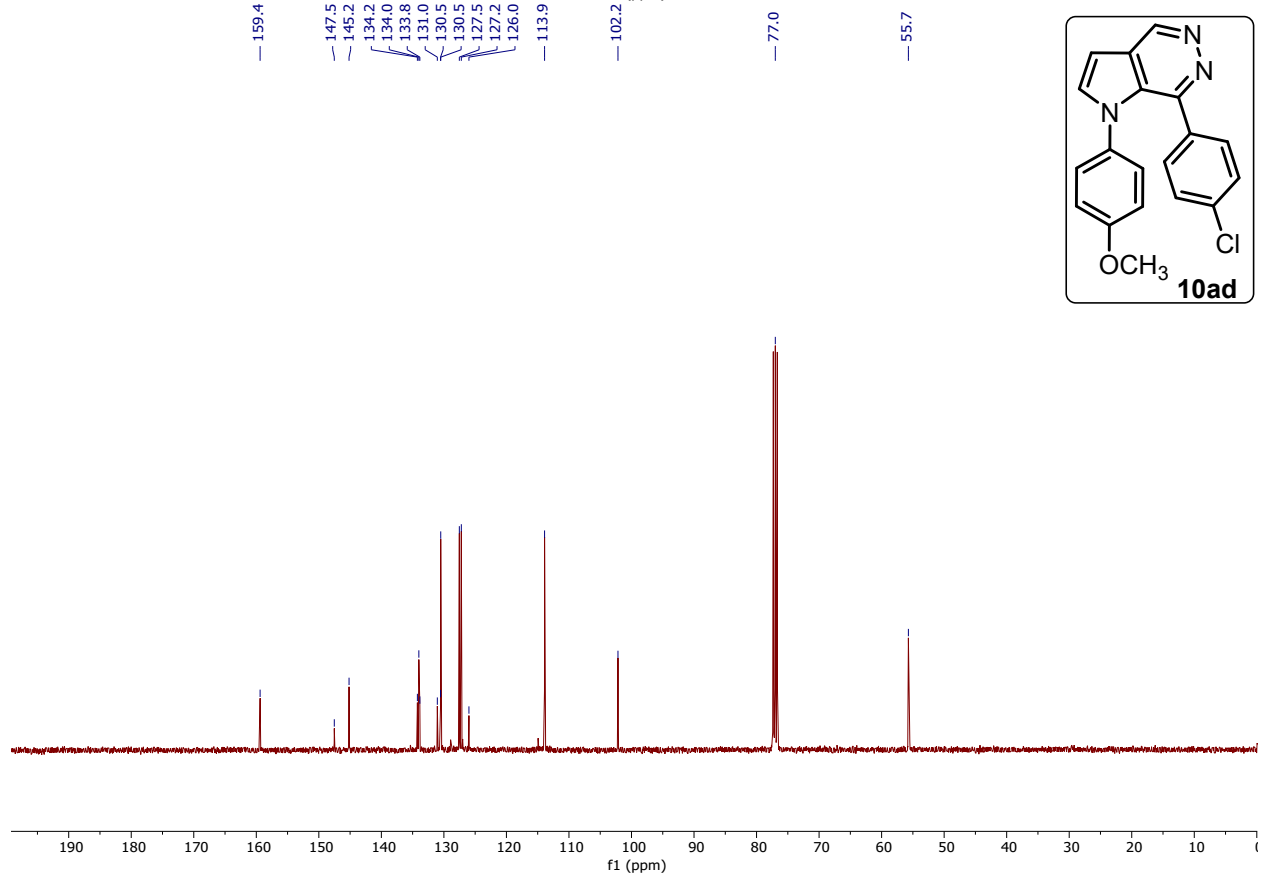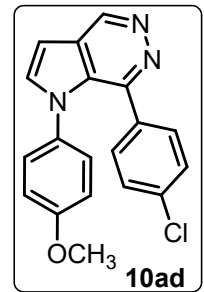

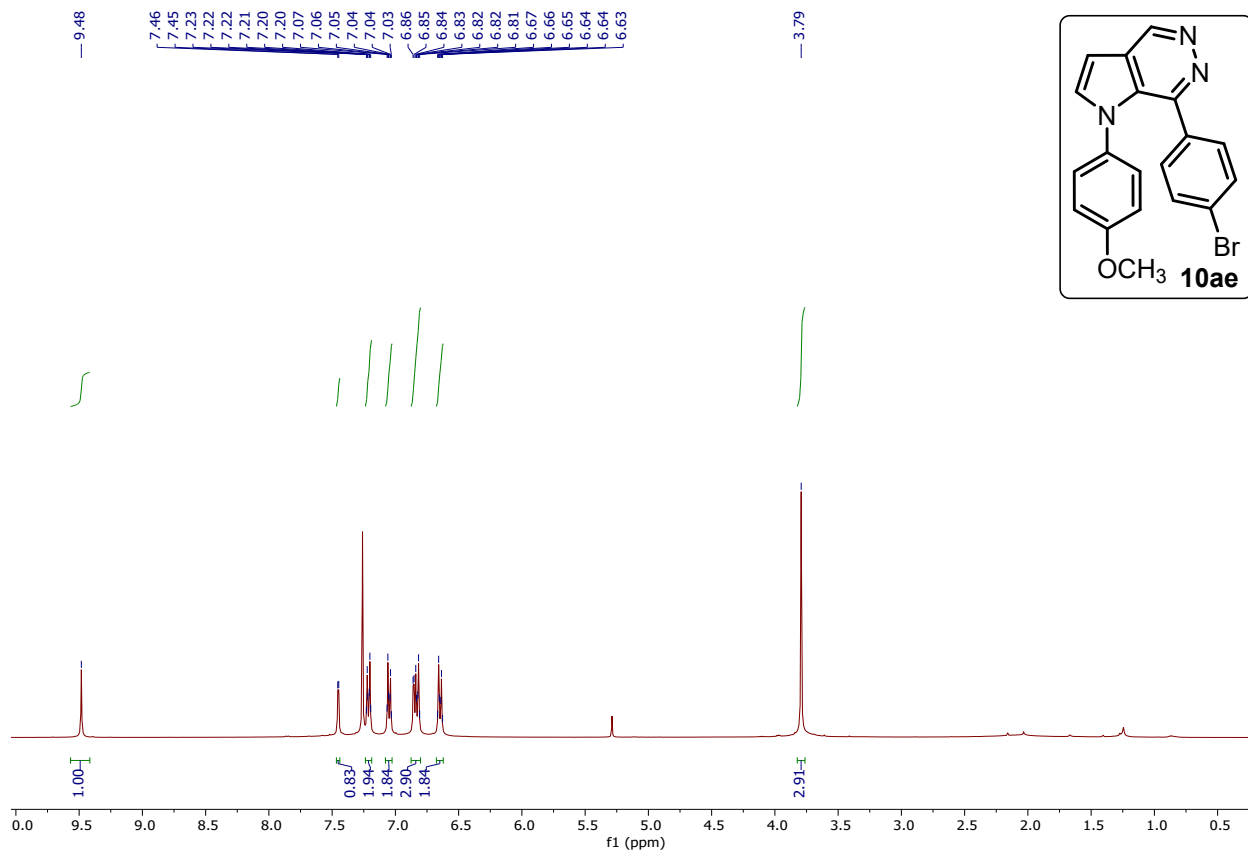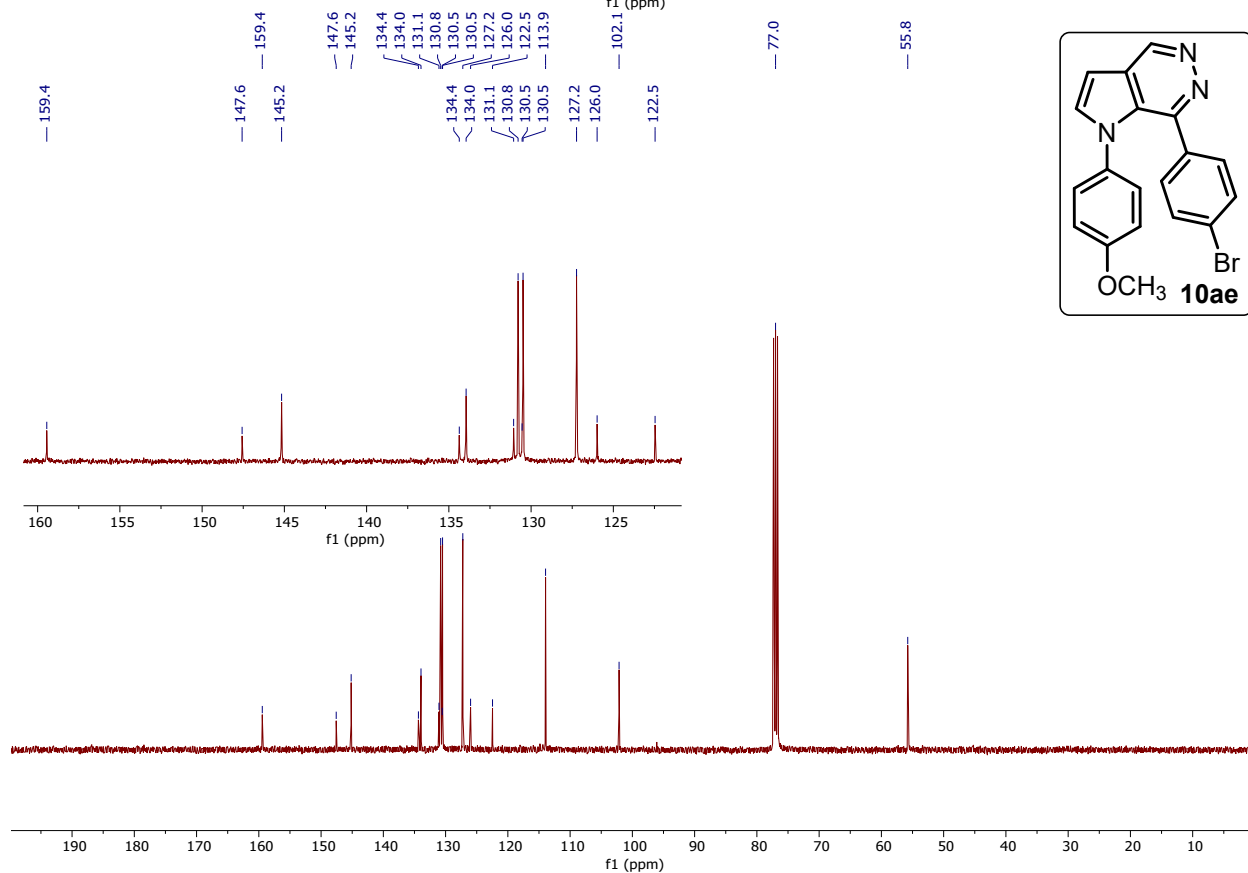



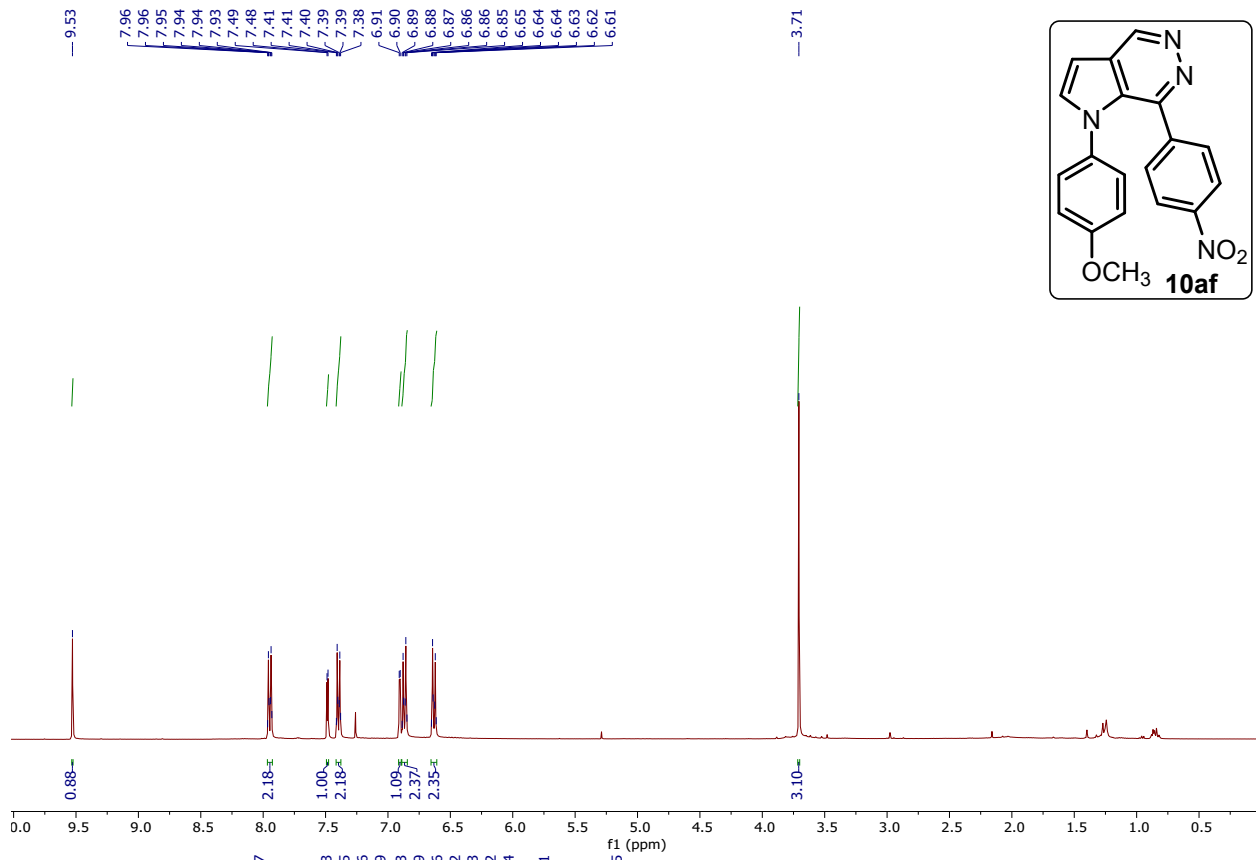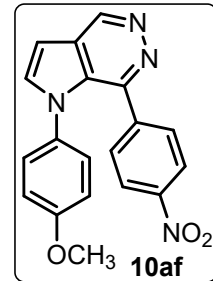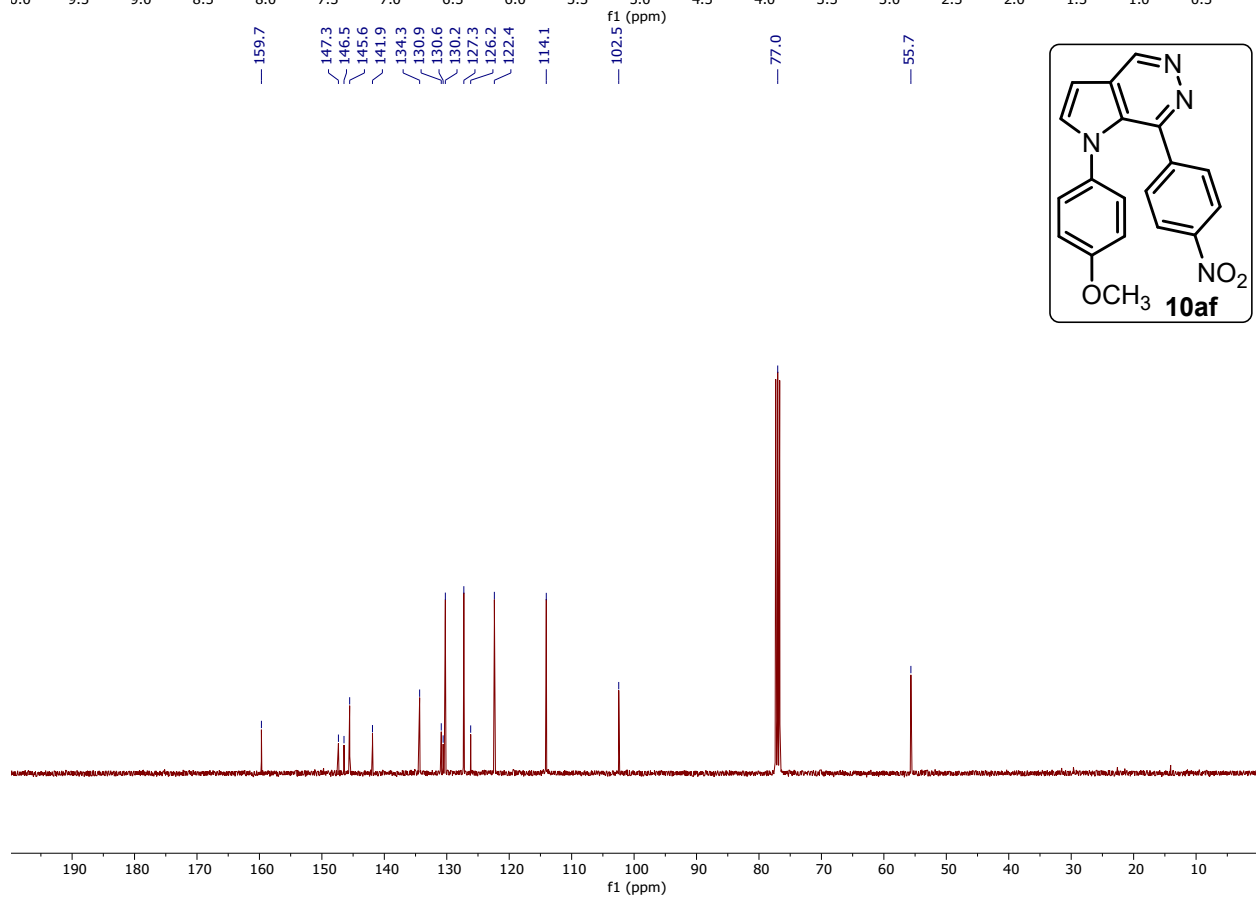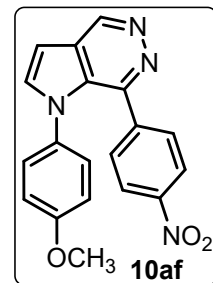

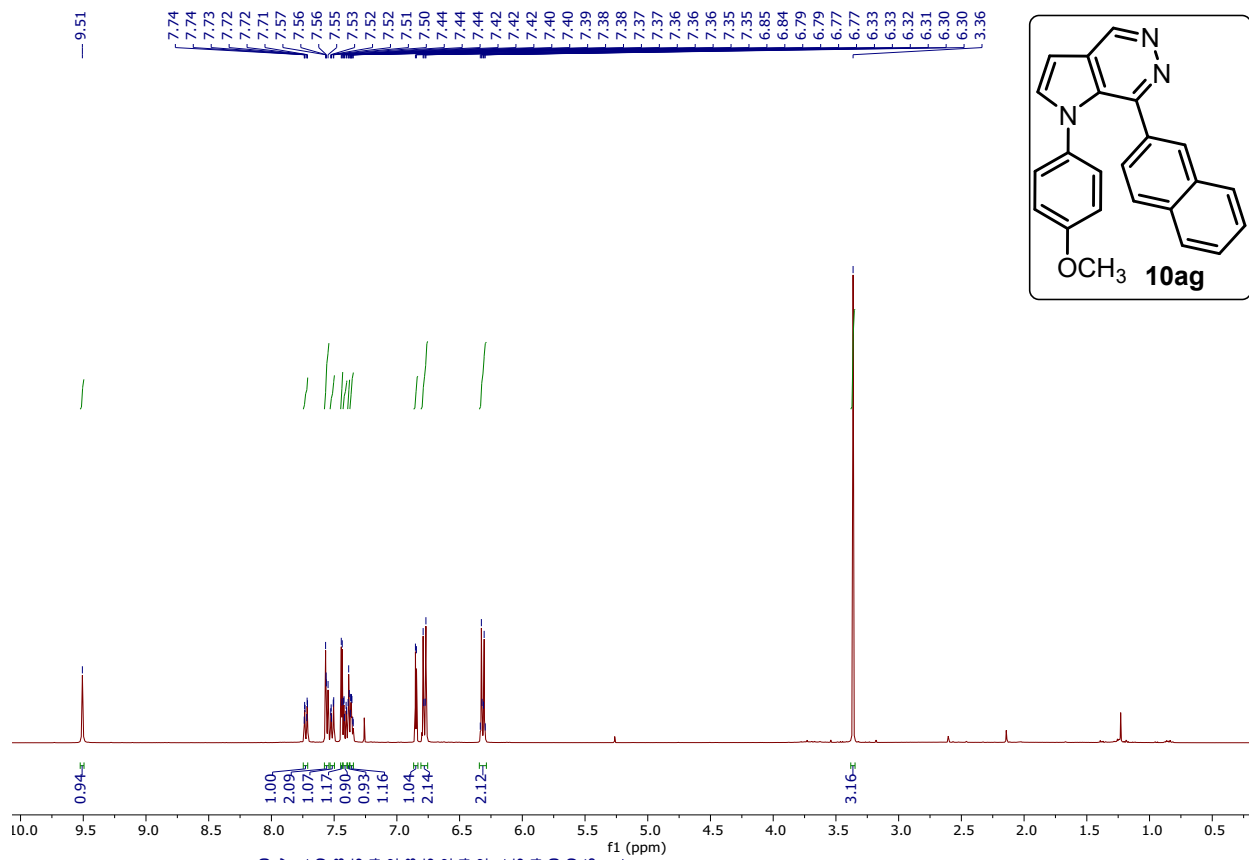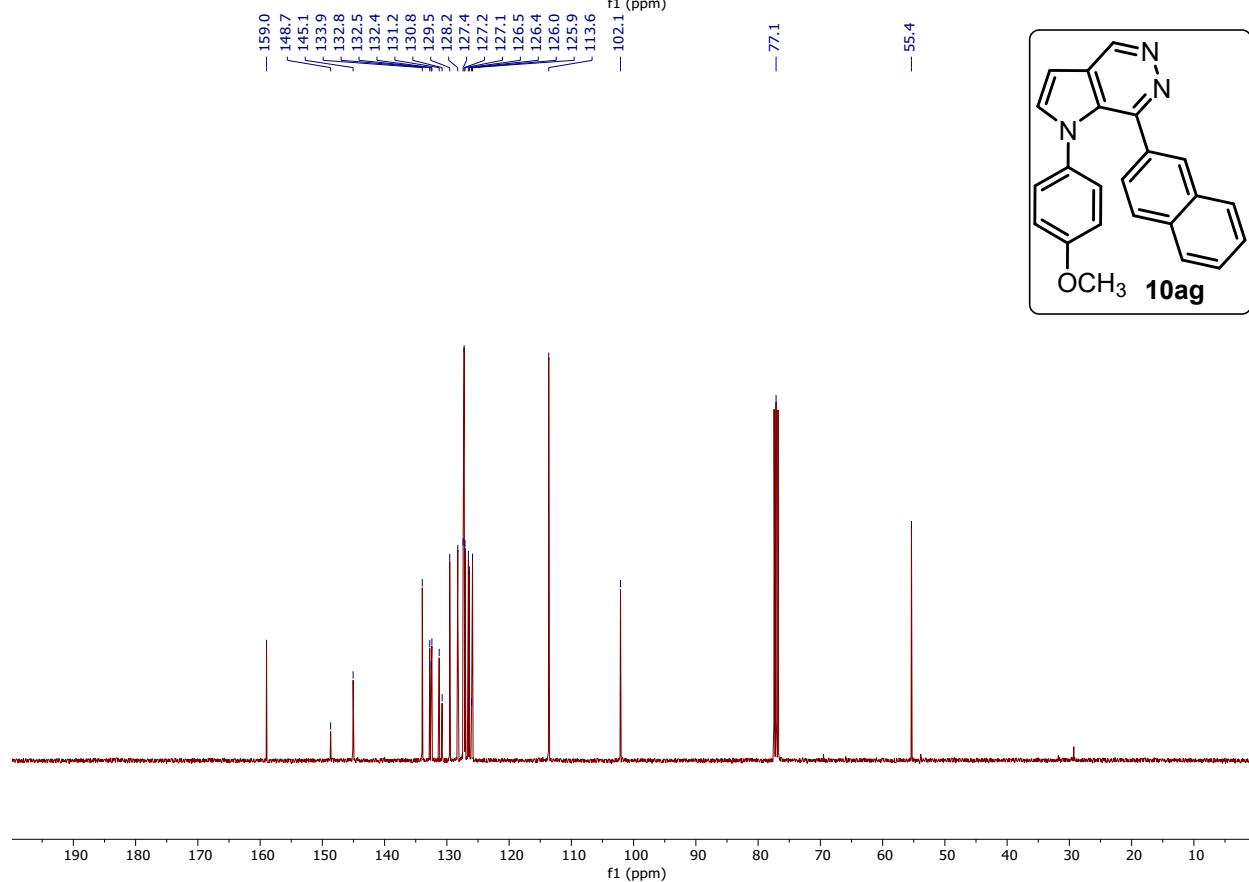



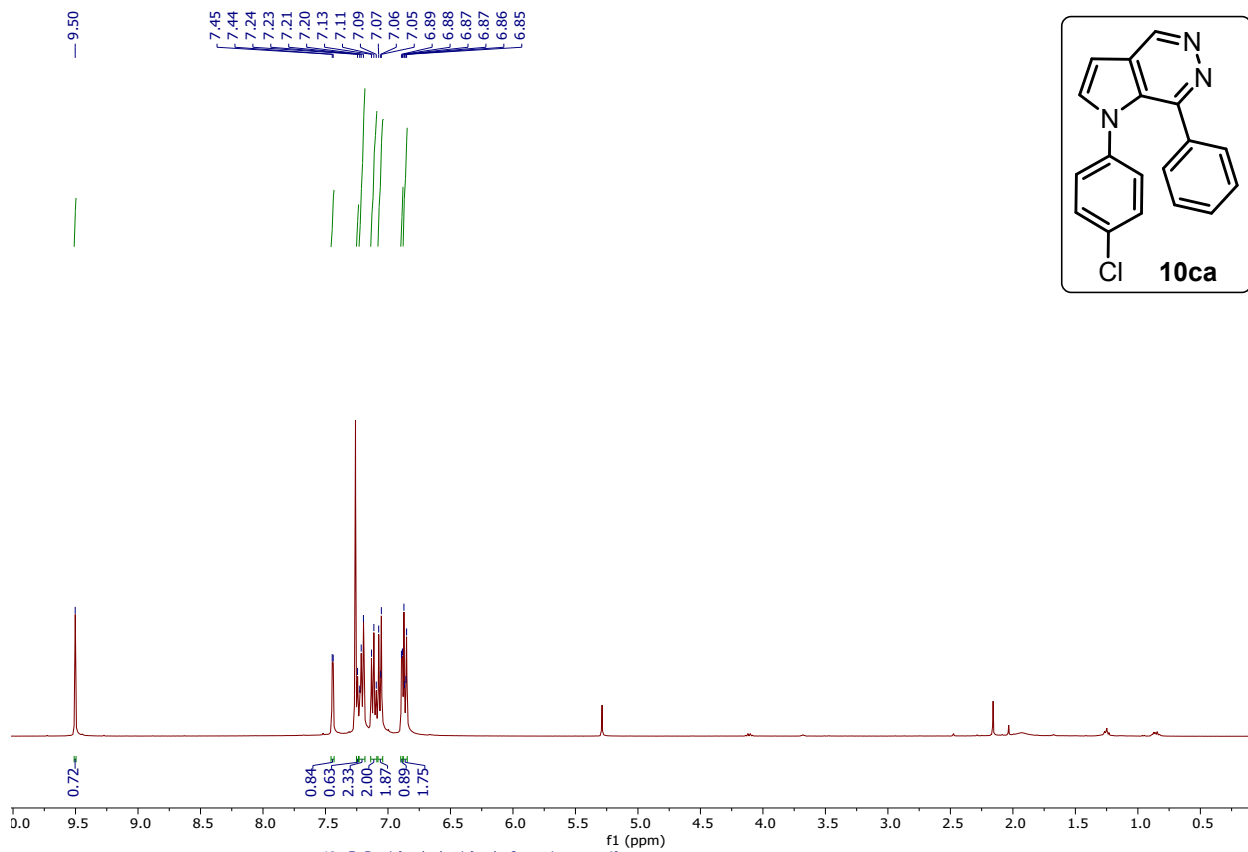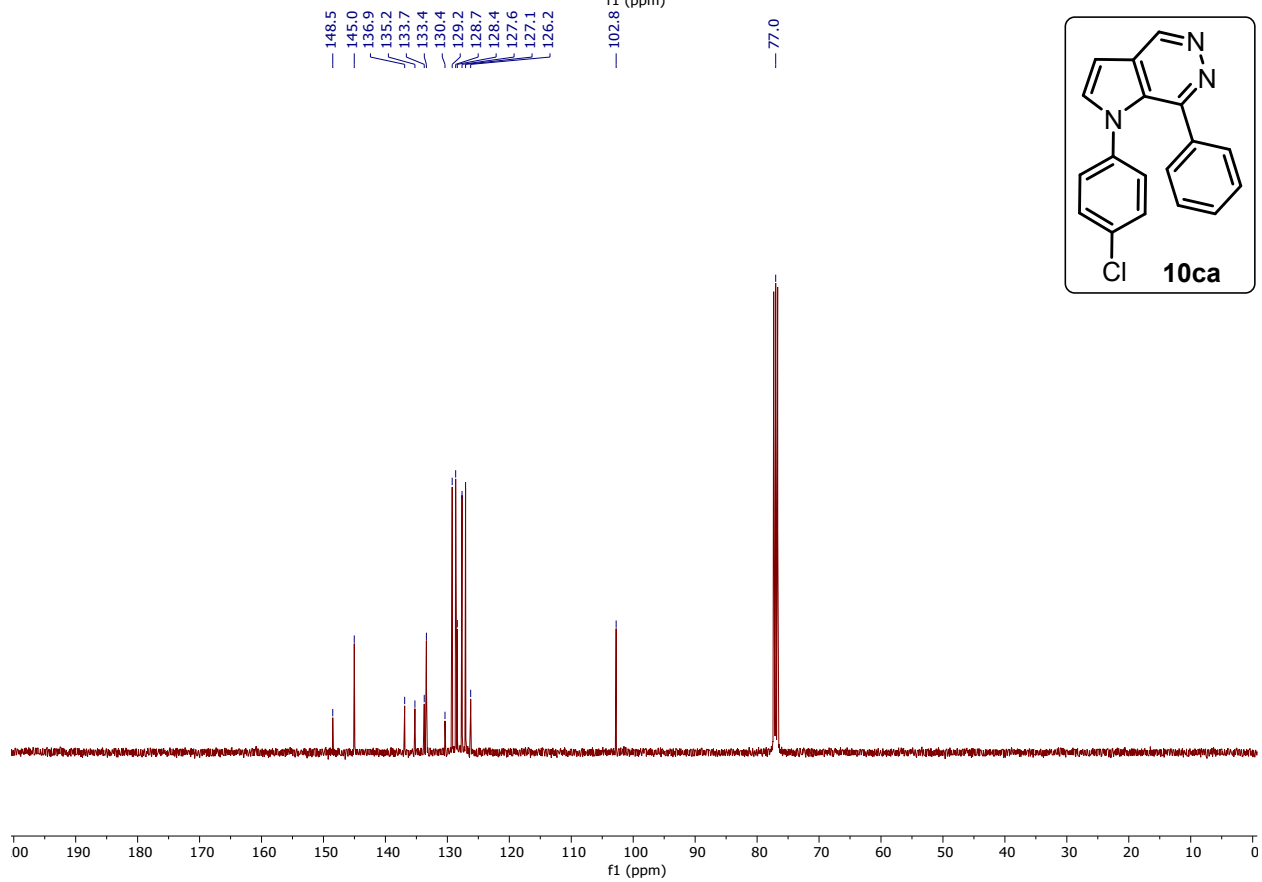

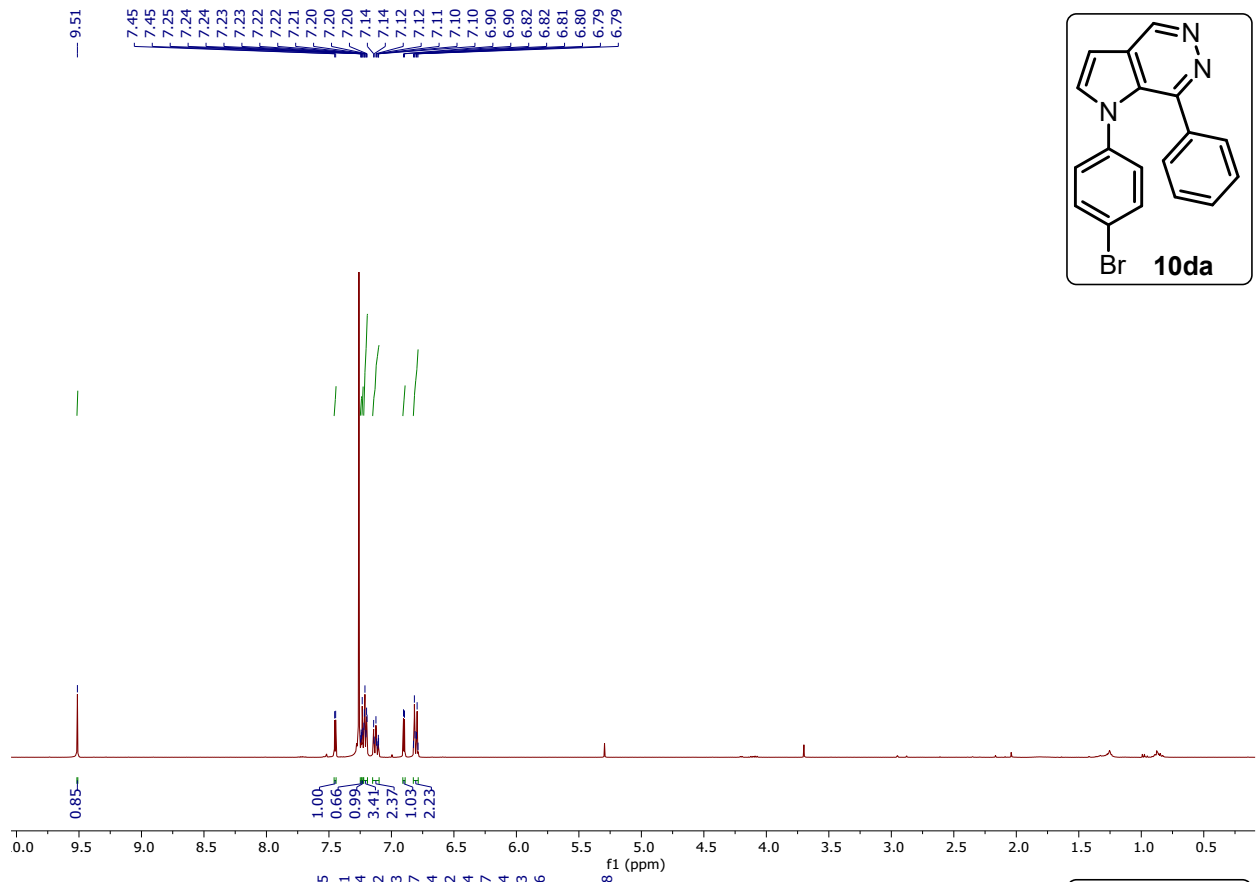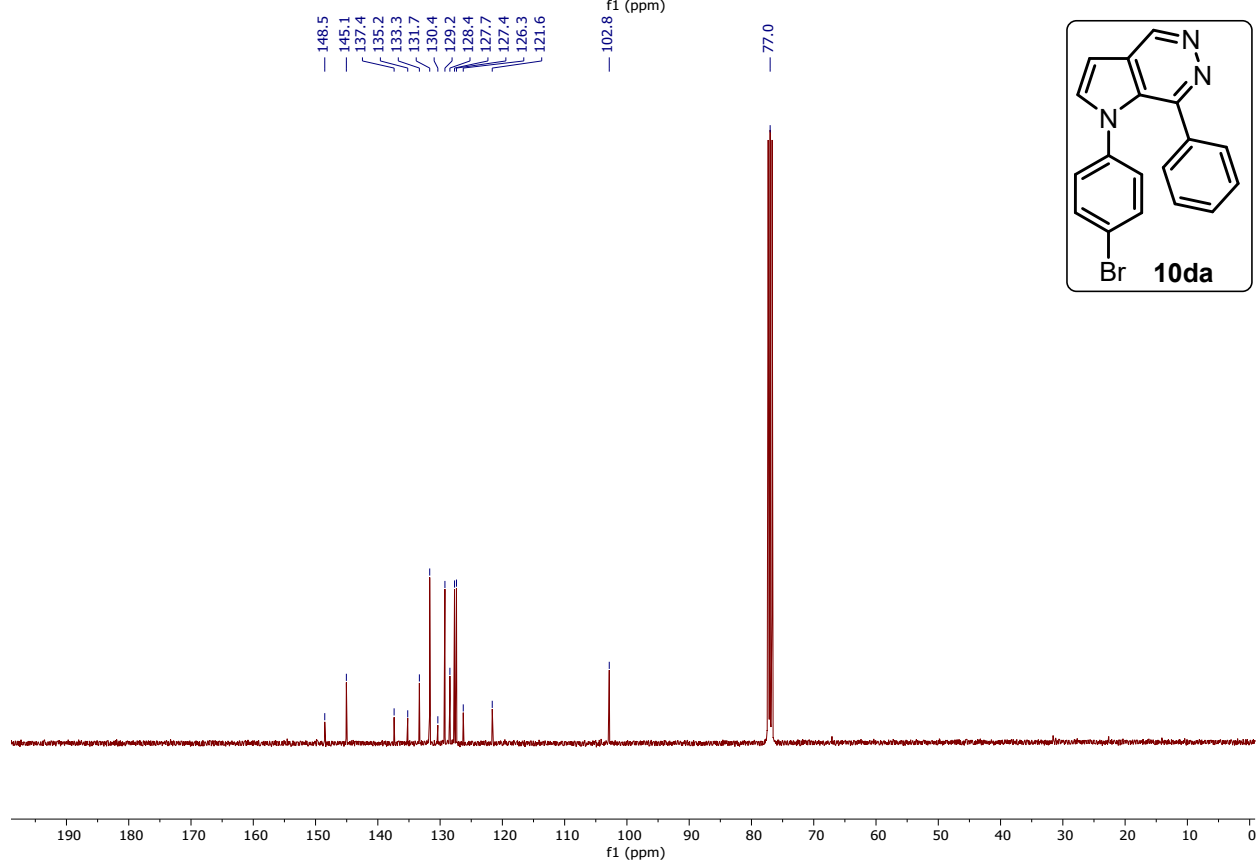

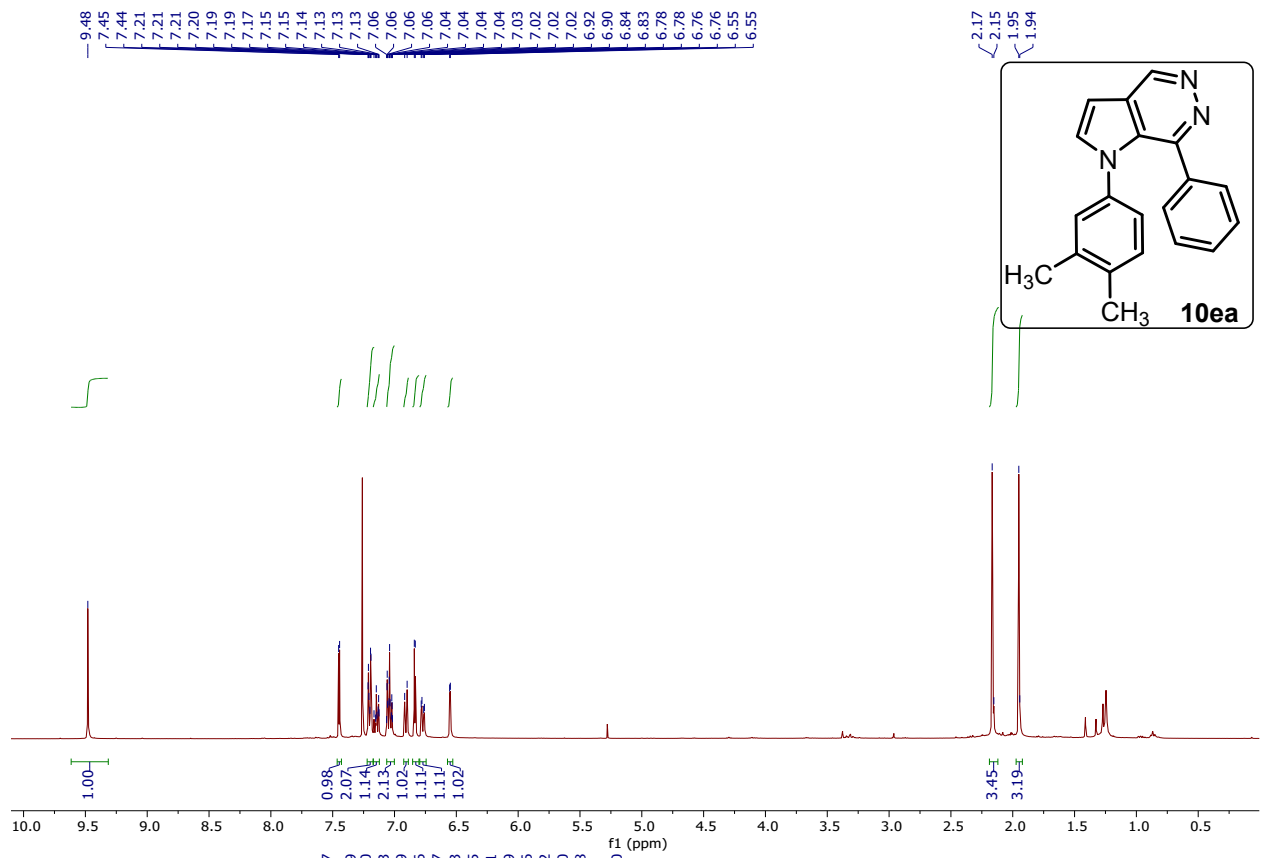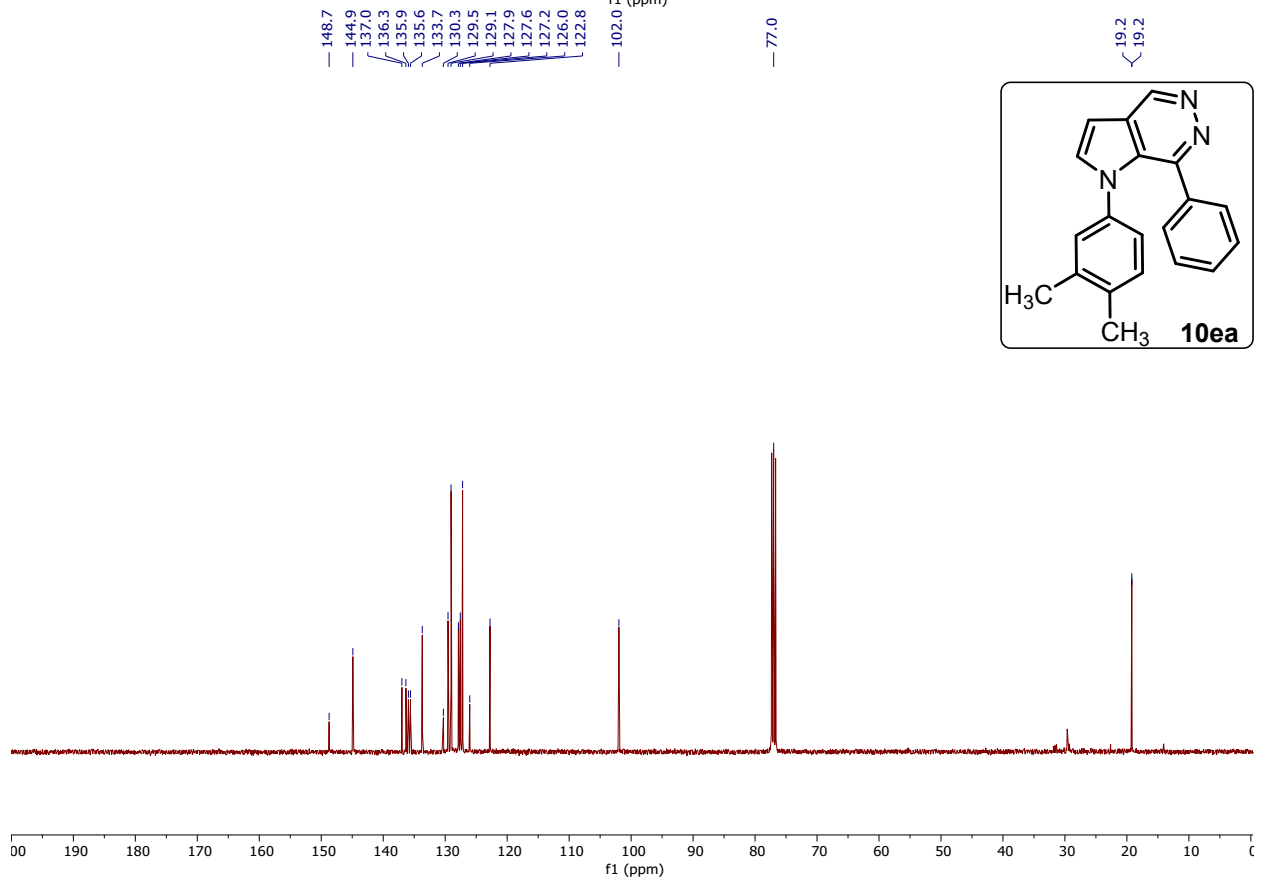

### Single Crystal X-Ray Diffraction Experiment and Analysis for Compound 7aj

**Single Crystal XRD Experiments for compound 7aj:** The title compound, C<sub>22</sub>H<sub>21</sub>N<sub>3</sub>O<sub>2</sub> crystallizes in the Triclinic space group *P*-1 with unit cell parameters  $a = 7.1067(8)$ ,  $b = 9.6899(10)$ ,  $c = 14.5223(12)$  Å  $\alpha = 84.346(8)$ ,  $\beta = 77.804(8)$ ,  $\gamma = 73.711(10)$  and  $Z = 2$ . The crystal structure is stabilized by C-H...O inter-molecular hydrogen bonds responsible for the formation of independent layers of chains. The crystal structure is further stabilized by  $\pi$ - $\pi$  stacking interactions between the Pyrrole and Pyridazine ring of the molecule.

#### **Crystal Structure Determination and Refinement:**

Block-shaped crystal selected for intensity data collection was of dimensions 0.30 x 0.20 x 0.10 mm. Accurate cell parameters were determined from 2042 reflections with  $3.7 < \theta < 27.31^\circ$ . X-ray intensity data of 6364 reflections (of which 3685 were unique) were collected on a computer controlled single crystal X-ray diffractometer with graphite mono-chromated Mo  $K\alpha$  radiation ( $\lambda = 0.71073$  Å) in  $\omega$  scan mode. Data collection was carried out in the range  $3.5 < \theta < 26.0^\circ$ . The number of reflections after applying the limiting criterion  $I > 2\sigma(I)$  converged to 1701 which were considered as observed ( $-8 \leq h \leq 8$ ,  $-11 \leq k \leq 11$ ,  $-16 \leq l \leq 17$ ). Data were corrected for Lorentz-polarization and multi-scan absorption corrections.<sup>[1]</sup> Full-matrix least-squares refinement was carried out using SHELXL97.<sup>[2]</sup> All the hydrogen atoms were geometrically fixed and allowed to ride on their parent carbon atoms with C-H = 0.97-0.98 Å with  $U_{\text{iso}}(\text{H}) = 1.2U_{\text{eq}}(\text{C})$ . The final refinement cycles converged to an  $R = 0.0589$  and  $wR (F^2) = 0.0961$  for the observed data. Residual electron densities ranged from -0.174 to 0.038 eÅ<sup>-3</sup>. The ORTEP diagram as crystal structure of **7aj** with CCDC No. 1455374 is illustrated in Figure S1.<sup>[3]</sup> The crystallographic data are summarized in Table 1.

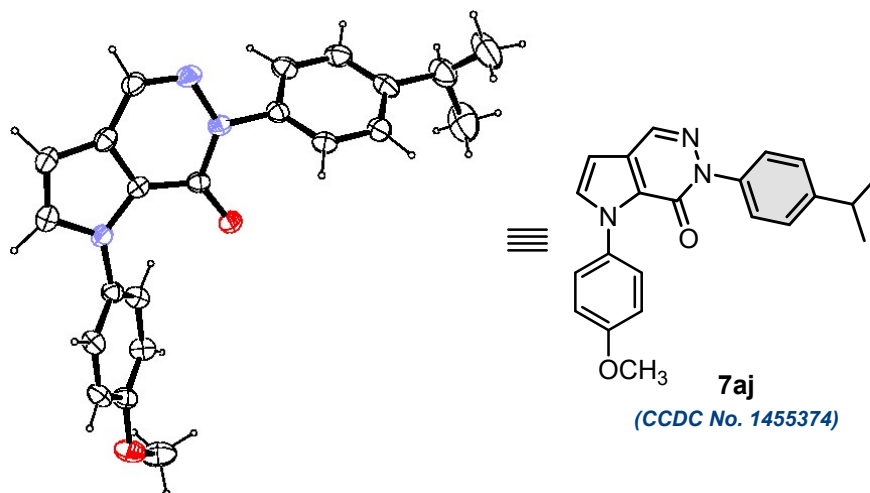

**Figure S1:** ORTEP plot of the molecule with 40% probability thermal ellipsoids. H-atoms are shown as small spheres of arbitrary radii.

**Table S1:** Crystal and experimental data

---

**Crystal data**

---

|                                   |                                                                                                                                |
|-----------------------------------|--------------------------------------------------------------------------------------------------------------------------------|
| Crystal description               | Block                                                                                                                          |
| Crystal colour                    | White                                                                                                                          |
| Crystal size                      | 0.3 x 0.2 x 0.1 mm                                                                                                             |
| Empirical formula                 | C <sub>22</sub> H <sub>21</sub> N <sub>3</sub> O <sub>2</sub>                                                                  |
| Formula weight                    | 359.42                                                                                                                         |
| Radiation, Wavelength             | Mo K $\alpha$ , 0.71073 Å                                                                                                      |
| Crystal system                    | Triclinic                                                                                                                      |
| Space group                       | <i>P</i> -1                                                                                                                    |
| Hall symbol                       | - <i>P</i> 1                                                                                                                   |
| No. of molecules per unit cell, Z | 2                                                                                                                              |
| Unit cell dimensions              | $a = 7.1067(8)$ , $b = 9.6899(10)$ , $c = 14.5223(12)$ Å<br>$\alpha = 84.346(8)$ , $\beta = 77.804(8)$ , $\gamma = 73.711(10)$ |



|                                           |                           |
|-------------------------------------------|---------------------------|
| Unit cell volume                          | 937.70(16) Å <sup>3</sup> |
| D <sub>x</sub>                            | 1.273 g cm <sup>-3</sup>  |
| Temperature                               | 293 (2) K                 |
| Absorption coefficient                    | 0.083 mm <sup>-1</sup>    |
| F(000)                                    | 380                       |
| θ range for collection of cell parameters | 3.716 <θ<27.3100 °        |

---

### ***Data collection***

---

|                                                   |                                                                                      |
|---------------------------------------------------|--------------------------------------------------------------------------------------|
| Measurement                                       | X'calibur system— <i>Oxford diffraction make, U.K.</i><br>[Oxford Diffraction, 2010] |
| Structure determination                           | Direct methods                                                                       |
| Range of indices                                  | <i>h</i> =-8 to 8, <i>k</i> = -11 to 11, <i>l</i> = -16 to 17                        |
| Reflections collected / unique                    | 6364 /3685                                                                           |
| Reflections observed ( <i>I</i> > 2σ( <i>I</i> )) | 1701                                                                                 |
| R <sub>int</sub>                                  | 0.042                                                                                |
| R <sub>sigma</sub>                                | 0.1152                                                                               |
| Scan mode                                         | ω scan                                                                               |
| θ <sub>max</sub>                                  | 26.00°                                                                               |
| θ <sub>min</sub>                                  | 3.54°                                                                                |
| <i>T</i> <sub>min</sub> , <i>T</i> <sub>max</sub> | 0.39569, 1.0000                                                                      |
| Absorption correction                             | multi-scan<br>[ <i>CrysAlis RED</i> ; Oxford Diffraction, 2010]                      |

---

### ***Refinement***

---

|            |                                             |
|------------|---------------------------------------------|
| Refinement | Full-matrix least squares on F <sup>2</sup> |
|------------|---------------------------------------------|

|                                      |                                                                                                                                                                                                                 |
|--------------------------------------|-----------------------------------------------------------------------------------------------------------------------------------------------------------------------------------------------------------------|
| No. of parameters refined            | 248                                                                                                                                                                                                             |
| Final <i>R</i>                       | 0.0589                                                                                                                                                                                                          |
| w <i>R</i> ( <i>F</i> <sup>2</sup> ) | 0.0961                                                                                                                                                                                                          |
| Weight                               | w=1/[σ <sup>2</sup> ( <i>F</i> <sub>o</sub> <sup>2</sup> )+( 0.0254 <i>P</i> ) <sup>2</sup> +0.00 <i>P</i> ]<br>where <i>P</i> =[ <i>F</i> <sub>o</sub> <sup>2</sup> +2 <i>F</i> <sub>c</sub> <sup>2</sup> ]/3. |
| Goodness-of-fit                      | 0.958                                                                                                                                                                                                           |
| ( Δ /σ ) <sub>max</sub>              | 0.001                                                                                                                                                                                                           |
| Final residual electron density      | -0.174 < Δρ < 0.038 e Å <sup>-3</sup>                                                                                                                                                                           |
| Software for structure solution      | SHELXS97 [Sheldrick, 2008]                                                                                                                                                                                      |
| Software for refinement              | SHELXL97 [Sheldrick, 2008]                                                                                                                                                                                      |
| Software for molecular plotting      | ORTEP-3[Farrugia,2012]; PLATON [Spek,2009]                                                                                                                                                                      |
| Software for geometrical calculation | PLATON [Spek, 2009]; PARST [Nardelli, 1995]                                                                                                                                                                     |

---

#### References:

1. G. M. Sheldrick, *Acta Cryst.*, **2008**, *A64*, 112.
2. L. J. Farrugia, *J. Appl. Cryst.*, **2012**, *45*, 849.
3. L. Spek, *Acta Cryst.*, **2009**, *D65*, 148.

## Single Crystal X-Ray Diffraction Experiment and Analysis for Compound 10ba

**Single Crystal XRD Experiments for compound 10ba (exp 1209\_MK-206):** The single crystal XRD data collection and data reduction were performed using CrysAlis PRO on a single crystal Rigaku Oxford XtaLab Pro Kappa dual home/near diffractometer. The crystals were kept at 133(2) K during data collection using CuK $\alpha$  ( $\lambda = 1.54184 \text{ \AA}$ ) radiation. Using Olex2<sup>[1]</sup>, the structure was solved with the ShelXT<sup>[2]</sup> structure solution program using Intrinsic Phasing and refined with the ShelXL<sup>[3]</sup> refinement package using Least Squares minimization.

### Single Crystal structure, Cell parameters and structure data of compound 10ba (exp 1209\_MK-206):

The single crystal of compound **10ba** (C<sub>18</sub>H<sub>13</sub>N<sub>3</sub>) (**exp 1209\_MK-206**) was crystallized as a colorless block through the slow evaporation of chloroform solution at room temperature. The compound **10ba** crystallized in monoclinic crystal system with P2<sub>1</sub>/c space group. Two independent molecules with slightly different bond parameters appeared in the structure solution in an asymmetric unit ( $Z'=2$ ) with the following crystal unit cell data.

**Crystal Data for 10ba** (C<sub>18</sub>H<sub>13</sub>N<sub>3</sub>)( $M=271.31 \text{ g/mol}$ ): monoclinic, space group P2<sub>1</sub>/c (no. 14),  $a = 17.6435(6) \text{ \AA}$ ,  $b = 9.6496(4) \text{ \AA}$ ,  $c = 15.5396(4) \text{ \AA}$ ,  $\beta = 91.290(3)^\circ$ ,  $V = 2644.99(16) \text{ \AA}^3$ ,  $Z = 8$ ,  $T = 133(2) \text{ K}$ ,  $\mu(\text{Cu K}\alpha) = 0.649 \text{ mm}^{-1}$ ,  $D_{\text{calc}} = 1.363 \text{ g/cm}^3$ , 16652 reflections measured ( $10.03^\circ \leq 2\Theta \leq 165.9^\circ$ ), 5587 unique ( $R_{\text{int}} = 0.0370$ ,  $R_{\text{sigma}} = 0.0418$ ) which were used in all calculations. The final  $R_1$  was 0.0471 ( $I > 2\sigma(I)$ ) and  $wR_2$  was 0.1343 (all data). The crystallographic details of the compound **10ba** are deposited to the Cambridge Crystallographic (CCDC 2254911). The crystal data and structure refinement for the compound **10ba** is shown in Table S1. The ORTEP diagram as crystal structure of **10ba** [**exp 1209\_MK-206**] is illustrated in Figure S1.

**Table 1 Crystal data and structure refinement for 10ba (exp\_1209\_MK-206\_20221017).**

|                     |                                                |
|---------------------|------------------------------------------------|
| Identification code | exp_1209_MK-206_20221017                       |
| Empirical formula   | C <sub>18</sub> H <sub>13</sub> N <sub>3</sub> |
| Formula weight      | 271.31                                         |
| Temperature/K       | 133(2)                                         |
| Crystal system      | monoclinic                                     |
| Space group         | P2 <sub>1</sub> /c                             |
| $a/\text{\AA}$      | 17.6435(6)                                     |
| $b/\text{\AA}$      | 9.6496(4)                                      |
| $c/\text{\AA}$      | 15.5396(4)                                     |
| $\alpha/^\circ$     | 90                                             |

|                                                |                                                                    |
|------------------------------------------------|--------------------------------------------------------------------|
| $\beta/^\circ$                                 | 91.290(3)                                                          |
| $\gamma/^\circ$                                | 90                                                                 |
| Volume/ $\text{\AA}^3$                         | 2644.99(16)                                                        |
| Z                                              | 8                                                                  |
| $\rho_{\text{calc}}/\text{g/cm}^3$             | 1.363                                                              |
| $\mu/\text{mm}^{-1}$                           | 0.649                                                              |
| F(000)                                         | 1136.0                                                             |
| Crystal size/ $\text{mm}^3$                    | 0.11 $\times$ 0.08 $\times$ 0.06                                   |
| Radiation                                      | Cu K $\alpha$ ( $\lambda = 1.54184$ )                              |
| 2 $\Theta$ range for data collection/ $^\circ$ | 10.03 to 165.9                                                     |
| Index ranges                                   | -21 $\leq h \leq 14$ , -11 $\leq k \leq 11$ , -19 $\leq l \leq 17$ |
| Reflections collected                          | 16652                                                              |
| Independent reflections                        | 5587 [ $R_{\text{int}} = 0.0370$ , $R_{\text{sigma}} = 0.0418$ ]   |
| Data/restraints/parameters                     | 5587/0/379                                                         |
| Goodness-of-fit on $F^2$                       | 1.091                                                              |
| Final R indexes [ $I \geq 2\sigma(I)$ ]        | $R_1 = 0.0471$ , $wR_2 = 0.1244$                                   |
| Final R indexes [all data]                     | $R_1 = 0.0558$ , $wR_2 = 0.1343$                                   |
| Largest diff. peak/hole / $e \text{\AA}^{-3}$  | 0.33/-0.26                                                         |

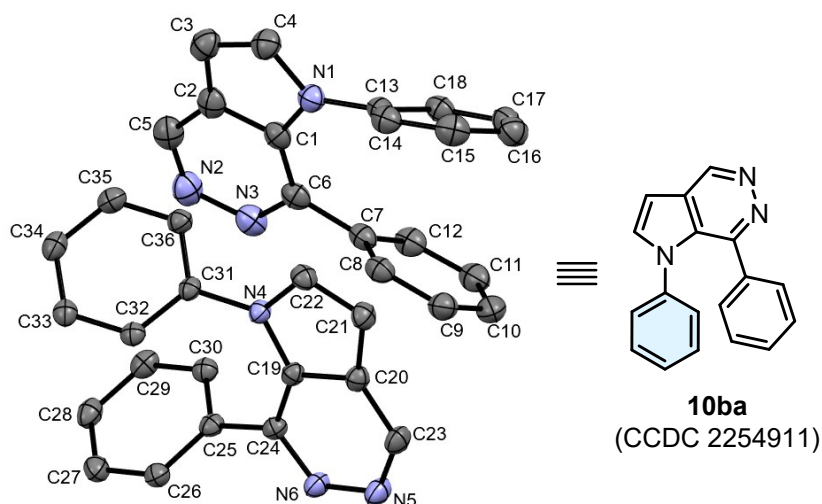

**Figure S1:** The ORTEP diagram of compound **10ba** (exp 1209\_MK-206) (CCDC 2254911). Two molecules appeared in an asymmetric unit; hydrogen atoms are not shown for clarity. The thermal ellipsoid is drawn at the 50 % probability level.

#### Refinement model description.

Number of restraints - 0, number of constraints - unknown.

Details:

1. Fixed Uiso

At 1.2 times of:

All C(H) groups

2.a Aromatic/amide H refined with riding coordinates:

C3 (H3), C4 (H4), C5 (H5), C8 (H8), C9 (H9), C10 (H10), C11 (H11), C12 (H12),  
C14 (H14), C15 (H15), C16 (H16), C17 (H17), C18 (H18), C21 (H21), C22 (H22), C23 (H23),  
C26 (H26), C27 (H27), C28 (H28), C29 (H29), C30 (H30), C32 (H32), C33 (H33),  
C34 (H34), C35 (H35), C36 (H36)

This report has been created with Olex2, compiled on 2022.04.07 svn.rca3783a0 for OlexSys.

## References:

1. Dolomanov, O.V., Bourhis, L.J., Gildea, R.J, Howard, J.A.K. & Puschmann, H., *J. Appl. Cryst.* **2009**, 42, 339-341.
2. Sheldrick, G.M. *Acta Cryst.* **2015**, A71, 3-8.
3. Sheldrick, G.M. *Acta Cryst.* **2015**, C71, 3-8.
